# Supplementary material
Source: PubMed Central journal article supplement (PMC8942616)
Supplement: NIHMS1789017-supplement-SI.pdf [file NIHMS1789017-supplement-SI.pdf]

## Supporting Information

### Substrate sequence controls regioselectivity of lanthionine formation by ProcM

Tung Le,<sup>a,#</sup> Kevin Jeanne Dit Fouque,<sup>b,#</sup> Miguel Santos-Fernandez,<sup>b</sup> Claudio D. Navo,<sup>c</sup> Gonzalo Jiménez-Osés,<sup>c</sup> Raymond Sarksian,<sup>a</sup> Francisco Alberto Fernandez Lima<sup>b,\*</sup> and Wilfred A. van der Donk<sup>a,\*</sup>

<sup>a</sup>Department of Chemistry and Howard Hughes Medical Institute, University of Illinois at Urbana–Champaign, 600 S. Mathews Ave, Urbana, IL. 61801, USA

<sup>b</sup> Department of Chemistry and Biochemistry, Florida International University, 11200 SW 8th St, Miami, FL 33199, USA.

<sup>c</sup> Center for Cooperative Research in Biosciences (CIC bioGUNE), Basque Research and Technology Alliance (BRTA), Bizkaia Technology Park, Building 800, 48160 Derio, Spain; Ikerbasque, Basque Foundation for Science, 48013 Bilbao, Spain.

# These authors contributed equally to this work

\*Correspondence: [vddonk@illinois.edu](mailto:vddonk@illinois.edu) (W.A. van der Donk); phone: (217) 244-5360, fax: (217) 244-8533. [fernandf@fiu.edu](mailto:fernandf@fiu.edu) (F. Fernandez-Lima); phone: (305) 348-2037

## Materials and methods

### General methods and reagents

Oligonucleotides were obtained from Integrated DNA Technologies. Cloning was performed using restriction enzymes, Q5 polymerase and Hifi DNA Assembly (for isothermal assembly) purchased from New England Biolabs (NEB). All polymerase chain reactions were carried out on a C1000 thermal cycler (Bio-Rad). DNA sequencing was performed by ACGT, Inc. MALDI-TOF MS was carried out on a Bruker Daltonics UltrafleXtreme MALDI TOF/TOF instrument (Bruker). LC-ESI-Q/TOF MS (ESI, electrospray ionization; Q: quadrupole) and MS/MS analyses were conducted using a Synapt G1 instrument with an Acquity UPLC system (Waters). To obtain MS/MS data at higher resolution, a second round of LC-MS/MS was performed on the same mutants using an Agilent Infinity1260 LC coupled to an Agilent 6545 LC/QTOF instrument, which are the MS/MS spectra shown. To compare LC and TIMS product ratios, the Extracted Ion Chromatograms (EIC) data in the figures are shown for the first round of samples, as these were the samples that were used for the TIMS.

### Strains and plasmids

Unless stated otherwise, *E. coli* DH10B and *E. coli* BL21(DE3)-T1<sup>R</sup> were used as hosts for cloning and protein expression, respectively. The co-expression vector pRSFDuet-1 was obtained from Novagen.

### Construction of the ProcA3.3 library

Plasmid pET15b\_procA3.3<sup>1</sup> was used as template for PCR using primers procA3.3\_invar\_F/R (Table S2) to amplify ProcA3.3 up until the first randomized residue of ProcA3.3 (i.e. including Thr11). The PCR product was gel-purified and inserted between EcoRI and AscI sites of pRSF\_procM<sup>2</sup> containing *procM* in multiple cloning site 2 (MCS 2) of pRSFDuet-1 to yield

pRSF\_procA3.3invar\_procM. About 4  $\mu$ g of this plasmid was digested with *AscI* and *NotI*, followed by gel-purification to yield the backbone for library construction.

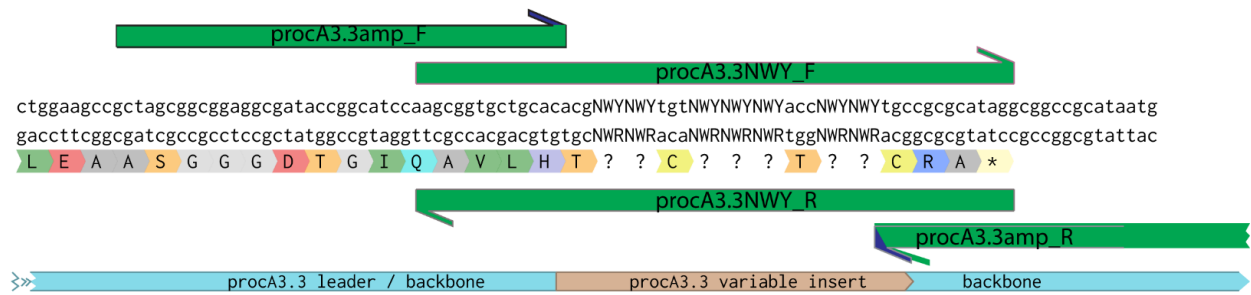

**Scheme S1.** Cloning scheme for *procA3.3* core region containing randomized NWY codons. Primers *procA3.3amp\_F/R* contain homology region with pRSF\_*procA3.3invar\_procM* (backbone) for isothermal assembly.

To create inserts containing the randomized core peptide of ProcA3.3, degenerate primers *procA3.3NWY\_F/R* were mixed and amplified with primers *procA3.3amp\_F/R* (Scheme S1), followed by gel-purification. About ~500 ng of this PCR product was combined with ~2  $\mu$ g of linearized pRSF\_*procA3.3invar\_procM* in 20  $\mu$ L of ddH<sub>2</sub>O and assembled by isothermal assembly (NEB Hifi DNA assembly) for 1 h to yield pRSF\_*procA3.3NWY\_procM*. The assembly reaction was purified and concentrated using DNA Clean & Concentrator-5 (Zymo Research), and eluted with 10  $\mu$ L of ddH<sub>2</sub>O. The purified DNA was divided into 5 aliquots and used to electroporate 5x25- $\mu$ L aliquots of 10-beta electrocompetent *E. coli* (NEB). Each aliquot was rescued with 1 mL of Super Optimal broth with Catabolite repression (SOC media: 0.5% (w/v) yeast extract, 2% (w/v) tryptone, 10 mM NaCl, 2.5 mM KCl, 20 mM MgSO<sub>4</sub>, 0.5% (w/v) glucose). The aliquots were pooled and incubated at 37 °C for 1 h. Then 5  $\mu$ L was plated as serial dilution onto LB/kanamycin plate to approximate the library size ( $10^6 - 10^7$  members), while the remaining culture was used to inoculate 50 mL of TB/kanamycin and cultured overnight at 37 °C, then divided into 5-mL

aliquots. One aliquot was used for miniprep while glycerol was added to the others to 10% and stored at -70 °C.

### **LC-ESI-MS/MS of ProcA3.3 variants**

LC-ESI MS and MS/MS analyses were performed on an Agilent Infinity1260 LC coupled to an Agilent 6545 LC/QTOF instrument. Separation was performed on a Vydac 214MS C4 column running at 0.4 mL/min. Mobile phases were solvent A (0.1% formic acid in water) and solvent B (0.1% formic acid in acetonitrile). The following gradient was used: 5% B for 3 min, 5-50%B over 10 min. For mass spectrometry, the instrument was set to run in positive mode with mass range 100 – 1700 m/z and the following parameters: gas temperature: 320 °C; gas flow: 8 L/min, nebulizer: 35 psi; sheath gas temperature: 350 °C. For MS: VCap: 3500; nozzle voltage: 1000 V; fragmentor: 125 V; skimmer 1: 65. For MS/MS, the instrument was set to run Auto MS2 mode where eight most abundant precursor ions in each survey scan were selected and fragmented at either 20 V or 25 V collision energy. MS/MS spectra were extracted from the  $[M+3H]^{3+}$  parent ion for each peptide and analyzed with the Interactive Peptide Spectral Annotator server.<sup>3</sup>

### **TIMS-MS/MS of ProcA3.3 variants**

Ion mobility experiments were performed on a custom built nanoESI-TIMS coupled to an Impact Q-TOF mass spectrometer (Bruker, Billerica, MA).<sup>4</sup> The TIMS unit was controlled using custom software in LabView (National Instruments) synchronized with the MS platform controls.<sup>5</sup> NanoESI emitters were pulled from quartz capillaries (O.D. = 1.0 mm and I.D. = 0.70 mm) using a Sutter Instrument Co. P2000 laser puller (Sutter Instruments, Novato, CA). The general fundamentals of TIMS as well as the calibration procedure have been described previously.<sup>6-9</sup> Peptide sample solutions were loaded in a pulled-tip capillary, housed in a mounted custom built XYZ stage in front of the MS inlet, and sprayed at 950 V via a tungsten wire inserted inside the

nESI emitters. TIMS-MS experiments were carried out using nitrogen ( $N_2$ ) as buffer gas at room temperature. The gas velocity was kept constant between the funnel entrance ( $P1 = 2.6$  mbar) and exit ( $P2 = 0.8$  mbar). An rf voltage of 250 V<sub>pp</sub> at 880 kHz was applied to all electrodes. A voltage ramp ( $V_{ramp}$ ) of -120 to -40 V, deflector voltage ( $V_{def}$ ) of 60 V and base voltage ( $V_{out}$ ) of 60 V were used for the mobility separations. Collision induced dissociation (CID) experiments were performed in the collision cell located after the TIMS analyzer. The mass-selected  $[M+3H]^{3+}$  ions were fragmented using nitrogen as collision gas at a collision energy of 20-30 V. The lanthipeptides were subjected to C<sub>18</sub> Zip Tip (Millipore, Burlington, MA) purification, resulting in solutions at final concentrations of  $\sim 5$   $\mu$ M in 50:50 acetonitrile/water containing 0.1% formic acid. The instrument was externally calibrated using the Tuning Mix (Agilent, Santa Clara, CA).

### **Molecular Dynamics (MD) simulations**

Unconstrained MD simulations were carried out with AMBER 18 package<sup>10</sup> implemented with *ff14SB*<sup>11</sup> and general Amber force field (*gaff2*)<sup>12</sup> force fields. Parameters for non-natural dehydroamino acids and (methyl)lanthionine were generated with the *antechamber* module of AMBER, using *gaff2* force field and with partial charges set to fit the electrostatic potential generated with HF/6-31G(d) using the RESP<sup>13</sup> method. The charges were calculated according to the Merz-Singh-Kollman scheme using Gaussian 16.<sup>14</sup> Each peptide was immersed in a water box with a 10 Å buffer of TIP3P<sup>15</sup> water molecules and neutralized by adding explicit Na<sup>+</sup> or Cl<sup>-</sup> counterions. A two-stage geometry optimization approach was performed. The first stage minimizes only the positions of solvent molecules and ions, and the second stage is an unrestrained minimization of all the atoms in the simulation cell. The systems were then heated by incrementing the temperature from 0 to 300 K under a constant pressure of 1 atm and periodic boundary conditions. Harmonic restraints of 10 kcal/mol were applied to the solute, and the Andersen temperature coupling scheme<sup>16,17</sup> was used to control and equalize the temperature. The time step

was kept at 1 fs during the heating stages, allowing potential inhomogeneities to self-adjust. Water molecules were treated with the SHAKE algorithm<sup>18</sup> such that the angle between the hydrogen atoms is kept fixed through the simulations. Long-range electrostatic effects were modelled using the particle mesh Ewald method.<sup>19</sup> An 8 Å cut-off was applied to Lennard-Jones interactions. Each system was equilibrated for 2 ns with a 2 fs time step at a constant volume and temperature of 300 K. Production trajectories were then run for 1.0 μs under the same conditions.

For the calculation of the relative energies of constitutional isomers, a total of 10,000 conformational configurations (1 frame every 100 ps) were extracted from each simulation of each isomer removing the water molecules and the Na<sup>+</sup> or Cl<sup>-</sup> counterions. Then, each configuration was minimized with AMBER 18 for a maximum of 5,000 minimization cycles (the steepest descent method is used for the initial 2,500 cycles, then it switches to conjugate gradient), using the Generalized Born (GB) OBC-II continuum solvent model.<sup>20</sup> The lowest energy computed for each isomer was considered in each case.

**Table S1.** Summary of LC-ESI-MS/MS ring pattern results of tested ProcA3.3 mutants. All mutants are mostly dehydrated at all three available Thr residues.

|             | Core peptide sequence            | Ring pattern    | Ratio LC-MS <sup>a</sup> | Ratio TIMS          |
|-------------|----------------------------------|-----------------|--------------------------|---------------------|
| WT          | GDTGIQAVLHT <b>AGCYGGTKM</b> CRA | overlapping     | >100:1 <sup>b</sup>      | >100:1 <sup>b</sup> |
| procA3.3_1  | GDTGIQAVLHT <b>LICFVITHL</b> CRA | both            | <1:100                   | 5:95                |
| procA3.3_2  | GDTGIQAVLHT <b>IDCVVITFY</b> CRA | non-overlapping | <1:100                   | <1:100              |
| procA3.3_3  | GDTGIQAVLHT <b>DNCLVFTFV</b> CRA | non-overlapping | <1:100                   | <1:100              |
| procA3.3_4  | GDTGIQAVLHT <b>IYCNNTVVI</b> CRA | both            | 20:80                    | 25:75               |
| procA3.3_5  | GDTGIQAVLHT <b>HNCVINTFV</b> CRA | both            | 40:60                    | 30:70               |
| procA3.3_6  | GDTGIQAVLHT <b>IYCIIDTHL</b> CRA | both            | 45:55                    | 52:48               |
| procA3.3_7  | GDTGIQAVLHT <b>HFCNYLTYI</b> CRA | non-overlapping | <1:100                   | <1:100              |
| procA3.3_8  | GDTGIQAVLHT <b>YNCYYTYI</b> CRA  | non-overlapping | <1:100                   | <1:100              |
| procA3.3_9  | GDTGIQAVLHT <b>ILCLIFTVD</b> CRA | both            | N.D.                     | 42:58               |
| procA3.3_10 | GDTGIQAVLHT <b>DFCLLVTHD</b> CRA | both            | N.D.                     | 30:70               |
| procA3.3_11 | GDTGIQAVLHT <b>HFCINLTYV</b> CRA | both            | 75:25                    | 75:25               |
| procA3.3_12 | GDTGIQAVLHT <b>NYCNLVTHL</b> CRA | non-overlapping | N.D.                     | <1:100 <sup>c</sup> |
| procA3.3_13 | GDTGIQAVLHT <b>LFCYGGTFD</b> CRA | both            | 40:60                    | <sup>d</sup>        |

<sup>a</sup> The integration ratio is estimated for overlapping/non-overlapping ring patterns. N.D. ratio could not be determined because of co-elution. <sup>b</sup> Estimated detection limit. <sup>c</sup> See Figure S29. <sup>d</sup> Isomers were separated by LC prior to analysis by TIMS. See Figure S30.

**Table S2. Primers used for this study**

|                 |                                                               |
|-----------------|---------------------------------------------------------------|
| procA3.3_NWY_F  | aagcggctgctgcacacgNWYNWYtgtNWYNWYNWYaccNWYNWYtgccgcgcatagtcca |
| procA3.3_NWY_R  | tcgactatgctgcggcaRWNRWNggtRWNRWNRWNacaRWNRWncgtgtgcagcaccgctt |
| proc3.3amp_F    | cggaggcgataccggcatccaagcggctgctgcacac                         |
| proc3.3amp_R    | actttctgttcgacttaagcattatgctggccgctatgctgcggc                 |
| procA3.3invar_F | caggatccgaattcggctcggcgccatgtcagaagaacaactcaaggc              |
| procA3.3invar_R | ttatgctggccgaagcttctgcacctgcaggtgcagcaccgcttgat               |

**Figure S1.** Deep sequencing analysis of the ProcA3.3 library. The distribution of the number of times amino acid sequences were identified in the library.

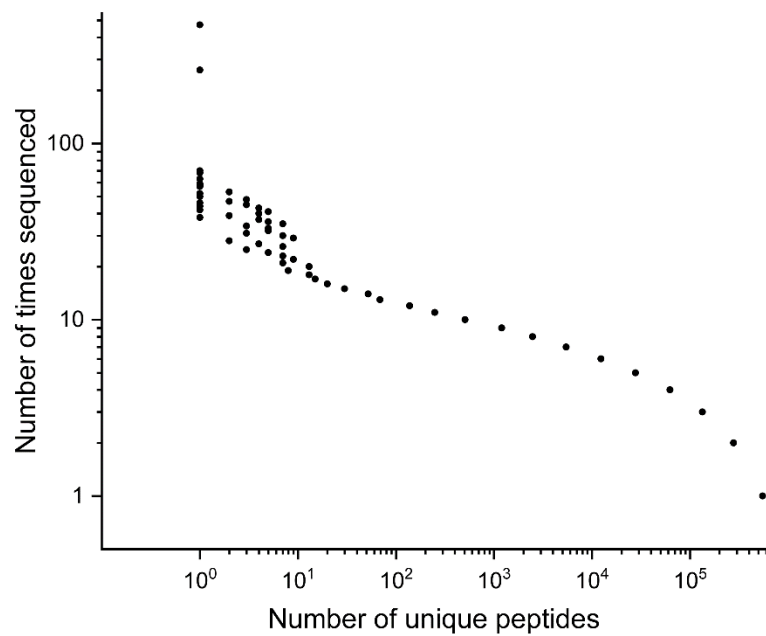



**Figure S2.** LC-ESI-MS/MS analysis of ProcA3.3\_2. (Top) extracted ion chromatogram (EIC) for the selected parent ion  $[M+3H]^{3+}$ ; product with non-overlapping rings is shown in red. (Middle) MS/MS spectrum with b- (blue) and y- (red) ion fragments. For clarity these peaks are boldened and colored. The height of the colored blue and red ions reflects the intensity of the ion; sometimes a grey ion appears to be within the bolded (widened) red and blue peaks; these correspond to the isotopic peaks of the matched fragments. (Bottom) list of matched fragment ions showing theoretical masses, charge states, and mass error (ppm).

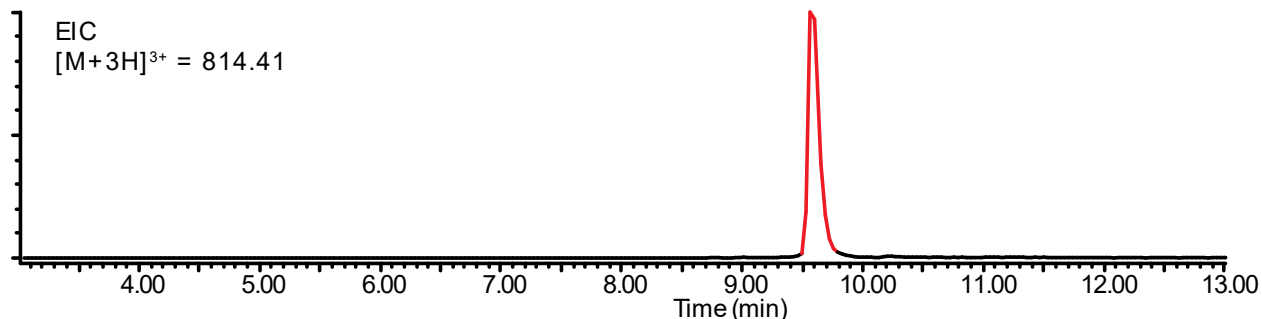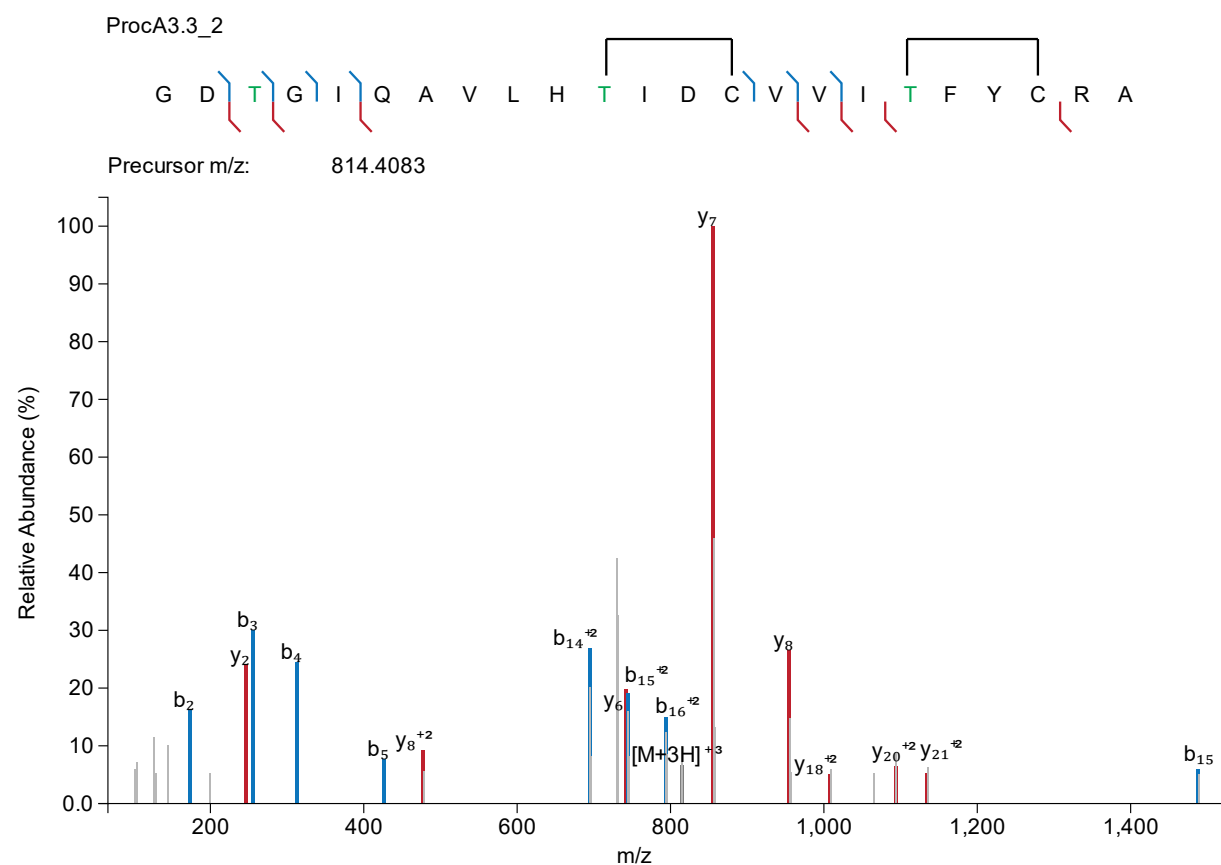

| ion | charge | Observed mass | Theoretical mass | Error (ppm) |
|-----|--------|---------------|------------------|-------------|
| b2  | 1      | 173.0555      | 173.0557         | -1.0168     |
| y2  | 1      | 246.156       | 246.1561         | -0.4425     |
| b3  | 1      | 256.0925      | 256.0928         | -1.2712     |
| b4  | 1      | 313.1138      | 313.1143         | -1.44       |
| b5  | 1      | 426.1976      | 426.1983         | -1.5946     |
| y8  | 2      | 477.7471      | 477.7469         | 0.2884      |
| b14 | 2      | 694.8343      | 694.835          | -0.9534     |

|      |   |           |           |         |
|------|---|-----------|-----------|---------|
| y6   | 1 | 742.3326  | 742.3341  | -2.0952 |
| b15  | 2 | 744.3682  | 744.3692  | -1.287  |
| b16  | 2 | 793.9017  | 793.9034  | -2.1494 |
| M+3H | 3 | 814.4082  | 814.4083  | -0.1997 |
| y7   | 1 | 855.4169  | 855.4182  | -1.4623 |
| y8   | 1 | 954.4854  | 954.4866  | -1.2456 |
| y18  | 2 | 1008.5128 | 1008.5133 | -0.5629 |
| y20  | 2 | 1093.5657 | 1093.5661 | -0.3968 |
| y21  | 2 | 1135.0845 | 1135.0846 | -0.1679 |
| b15  | 1 | 1487.7327 | 1487.7311 | 1.0576  |

**Figure S3.** LC-ESI-MS/MS analysis of ProcA3.3\_3 modified by ProcM. (Top) extracted ion chromatogram (EIC) for the selected parent ion  $[M+3H]^{3+}$ ; product with non-overlapping rings is shown in red. (Middle) MS/MS spectrum with b- (blue) and y- (red) ion fragments. For clarity these peaks are boldened and colored. The height of the colored blue and red ions reflects the intensity of the ion; sometimes a grey ion appears to be within the bolded (widened) red and blue peaks; these correspond to the isotopic peaks of the matched fragments. (Bottom) list of matched fragment ions showing theoretical masses, charge states, and mass error (ppm).

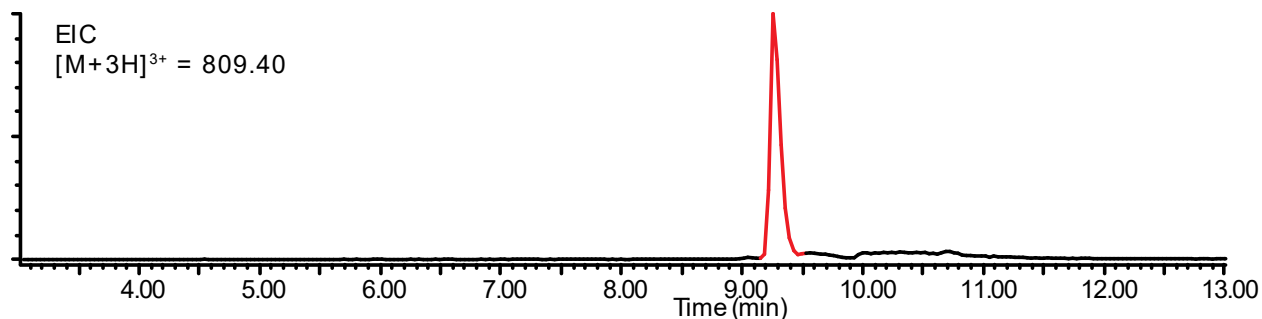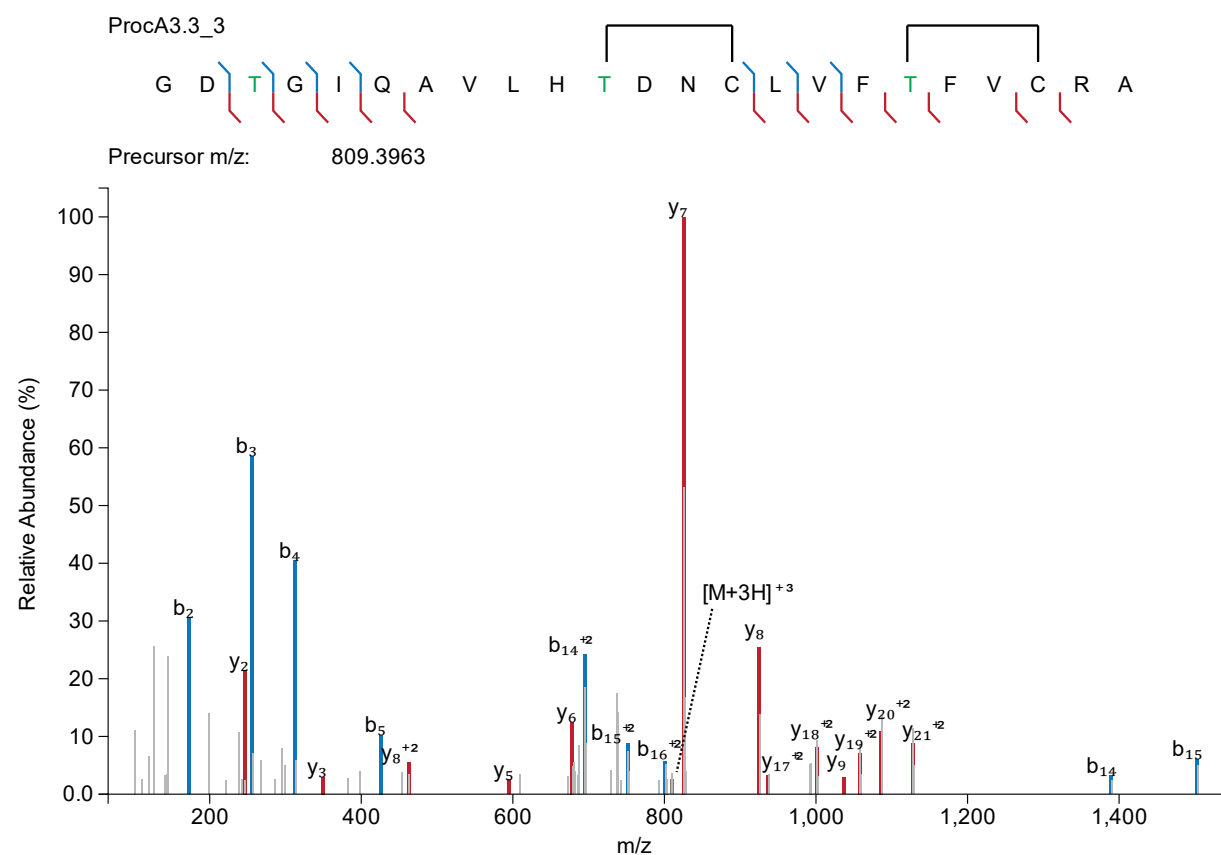

| ion | charge | Observed mass | Theoretical mass | Error (ppm) |
|-----|--------|---------------|------------------|-------------|
| b2  | 1      | 173.0549      | 173.0557         | -4.5099     |
| y2  | 1      | 246.1552      | 246.1561         | -3.5146     |
| b3  | 1      | 256.0921      | 256.0928         | -2.7169     |
| b4  | 1      | 313.1135      | 313.1143         | -2.4265     |
| y3  | 1      | 349.1644      | 349.1653         | -2.4491     |
| b5  | 1      | 426.1974      | 426.1983         | -2.1581     |

|      |   |          |          |         |
|------|---|----------|----------|---------|
| y8   | 2 | 462.7409 | 462.7416 | -1.6153 |
| y5   | 1 | 595.2972 | 595.3021 | -8.1961 |
| y6   | 1 | 678.3387 | 678.3392 | -0.7289 |
| b14  | 2 | 695.3141 | 695.3144 | -0.4671 |
| b15  | 2 | 751.8566 | 751.8565 | 0.1931  |
| b16  | 2 | 801.3907 | 801.3907 | 0.0477  |
| M+3H | 3 | 809.3969 | 809.3963 | 0.7297  |
| y7   | 1 | 825.4085 | 825.4076 | 1.085   |
| y8   | 1 | 924.4761 | 924.476  | 0.0882  |
| y17  | 2 | 936.966  | 936.966  | -0.0151 |
| y18  | 2 | 1000.995 | 1000.995 | -0.0041 |
| y9   | 1 | 1037.56  | 1037.56  | -0.5575 |
| y19  | 2 | 1057.538 | 1057.537 | 0.346   |
| y20  | 2 | 1086.049 | 1086.048 | 0.6757  |
| y21  | 2 | 1127.568 | 1127.567 | 0.8658  |
| b14  | 1 | 1389.622 | 1389.622 | 0.5231  |
| b15  | 1 | 1502.707 | 1502.706 | 0.7765  |

**Figure S4.** LC-ESI-MS/MS analysis of ProcA3.3 4 modified by ProcM. (Top) extracted ion chromatogram for the selected parent ion  $[M+3H]^{3+}$ ; product with overlapping rings is shown in blue and product with non-overlapping rings is shown in red; (Middle) MS/MS spectrum with b- (blue) and y- (red) ion fragments. For clarity these peaks are boldened and colored. The height of the colored blue and red ions reflects the intensity of the ion; sometimes a grey ion appears to be within the bolded (widened) red and blue peaks; these correspond to the isotopic peaks of the matched fragments. (Bottom) list of matched fragment ions showing theoretical masses, charge states, and mass error (ppm).

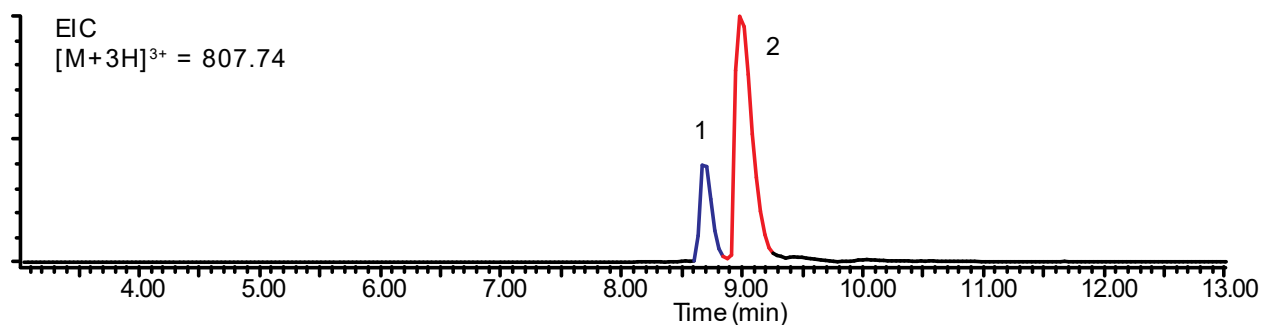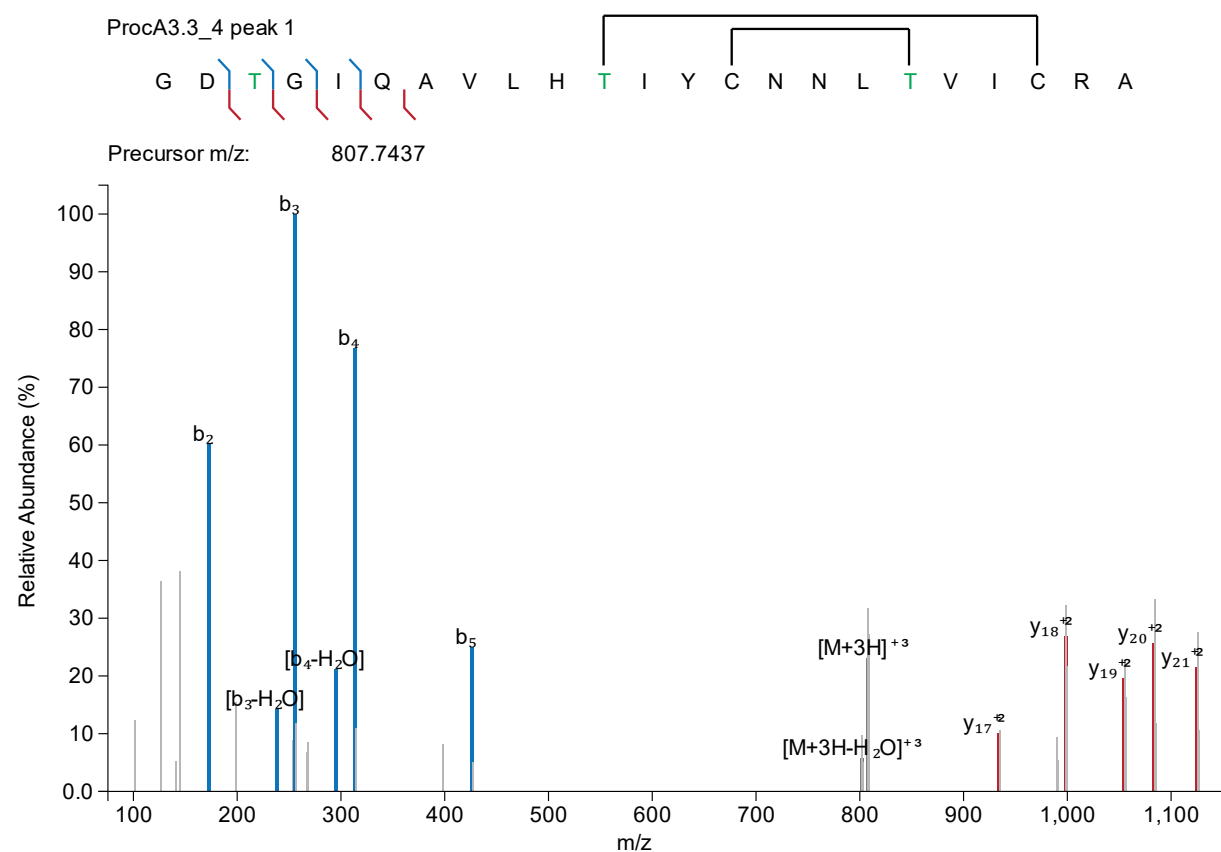

| ion | charge | Observed mass | Theoretical mass | Error (ppm) |
|-----|--------|---------------|------------------|-------------|
| b2  | 1      | 173.0556      | 173.0557         | -0.2895     |
| b3  | 1      | 238.0821      | 238.0822         | -0.4611     |
| b3  | 1      | 256.093       | 256.0928         | 0.6627      |
| b4  | 1      | 295.1037      | 295.1037         | 0.0754      |
| b4  | 1      | 313.1144      | 313.1143         | 0.3939      |

|      |   |           |           |         |
|------|---|-----------|-----------|---------|
| b5   | 1 | 426.1981  | 426.1983  | -0.574  |
| M+3H | 3 | 801.7405  | 801.7402  | 0.3588  |
| M+3H | 3 | 807.7439  | 807.7437  | 0.2698  |
| y17  | 2 | 934.4867  | 934.4871  | -0.4092 |
| y18  | 2 | 998.5162  | 998.5164  | -0.2019 |
| y19  | 2 | 1055.0583 | 1055.0584 | -0.1453 |
| y20  | 2 | 1083.5693 | 1083.5692 | 0.1333  |
| y21  | 2 | 1125.0879 | 1125.0877 | 0.1618  |

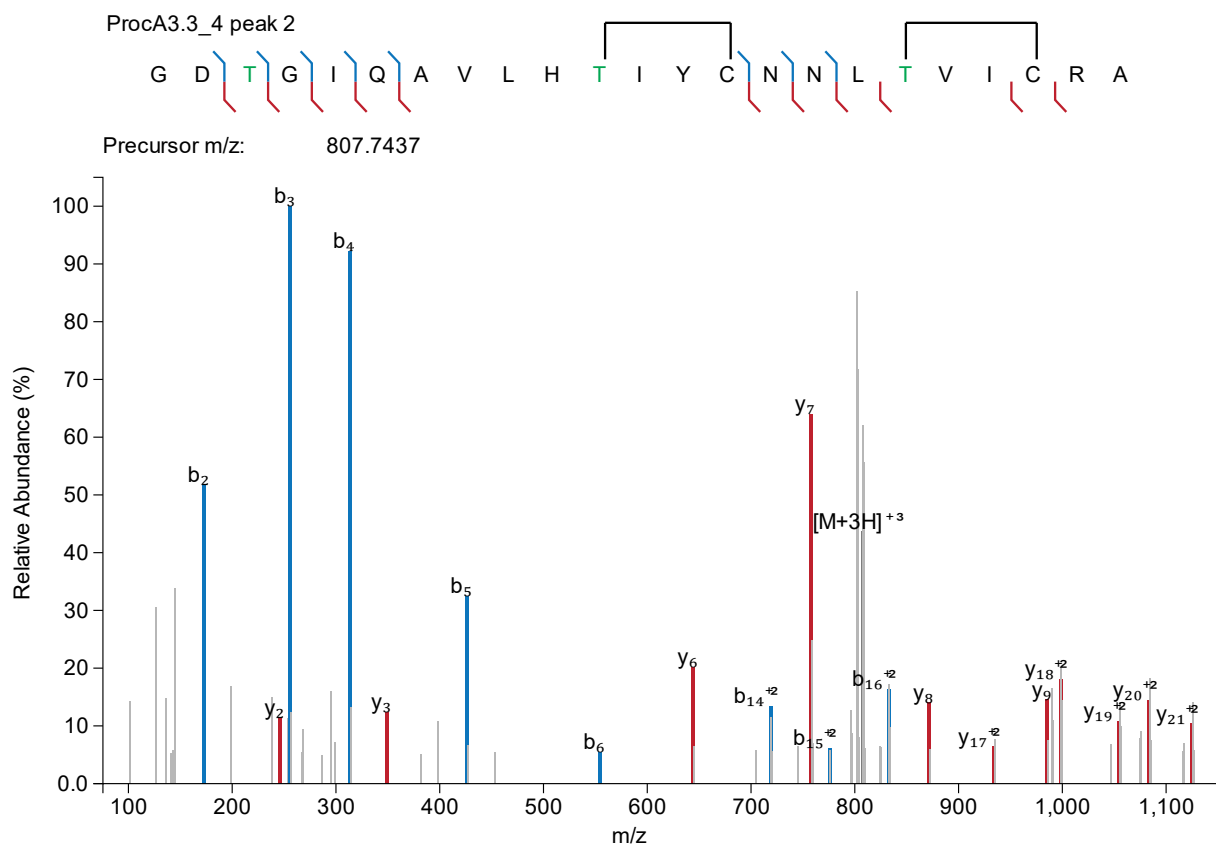

| ion | charge | Observed mass | Theoretical mass | Error (ppm) |
|-----|--------|---------------|------------------|-------------|
| b2  | 1      | 173.0553      | 173.0557         | -2.1763     |
| y2  | 1      | 246.1561      | 246.1561         | -0.0507     |
| b3  | 1      | 256.0929      | 256.0928         | 0.5706      |
| b4  | 1      | 313.1146      | 313.1143         | 1.0261      |
| y3  | 1      | 349.1654      | 349.1653         | 0.426       |
| b5  | 1      | 426.1984      | 426.1983         | 0.1204      |
| b6  | 1      | 554.2567      | 554.2569         | -0.3895     |
| y6  | 1      | 644.3545      | 644.3548         | -0.4723     |
| b14 | 2      | 718.8531      | 718.8532         | -0.0624     |
| y7  | 1      | 757.439       | 757.4389         | 0.0619      |
| b15 | 2      | 775.8747      | 775.8746         | 0.0862      |

|      |   |           |           |         |
|------|---|-----------|-----------|---------|
| M+3H | 3 | 807.7448  | 807.7437  | 1.3125  |
| b16  | 2 | 832.8961  | 832.8961  | 0.039   |
| y8   | 1 | 871.4814  | 871.4818  | -0.4622 |
| y17  | 2 | 934.4867  | 934.4871  | -0.4305 |
| y9   | 1 | 985.5242  | 985.5248  | -0.5447 |
| y18  | 2 | 998.5161  | 998.5164  | -0.2806 |
| y19  | 2 | 1055.0586 | 1055.0584 | 0.1905  |
| y20  | 2 | 1083.5694 | 1083.5692 | 0.2396  |
| y21  | 2 | 1125.088  | 1125.0877 | 0.2076  |

**Figure S5.** LC-ESI-MS/MS analysis of ProcA3.3\_5 modified by ProcM. (Top) extracted ion chromatogram for the selected parent ion  $[M+3H]^{3+}$ ; product with overlapping rings is shown in blue and product with non-overlapping rings is shown in red; (Middle) MS/MS spectrum with b- (blue) and y- (red) ion fragments. For clarity these peaks are boldened and colored. The height of the colored blue and red ions reflects the intensity of the ion; sometimes a grey ion appears to be within the bolded (widened) red and blue peaks; these correspond to the isotopic peaks of the matched fragments. (Bottom) list of matched fragment ions showing theoretical masses, charge states, and mass error (ppm).

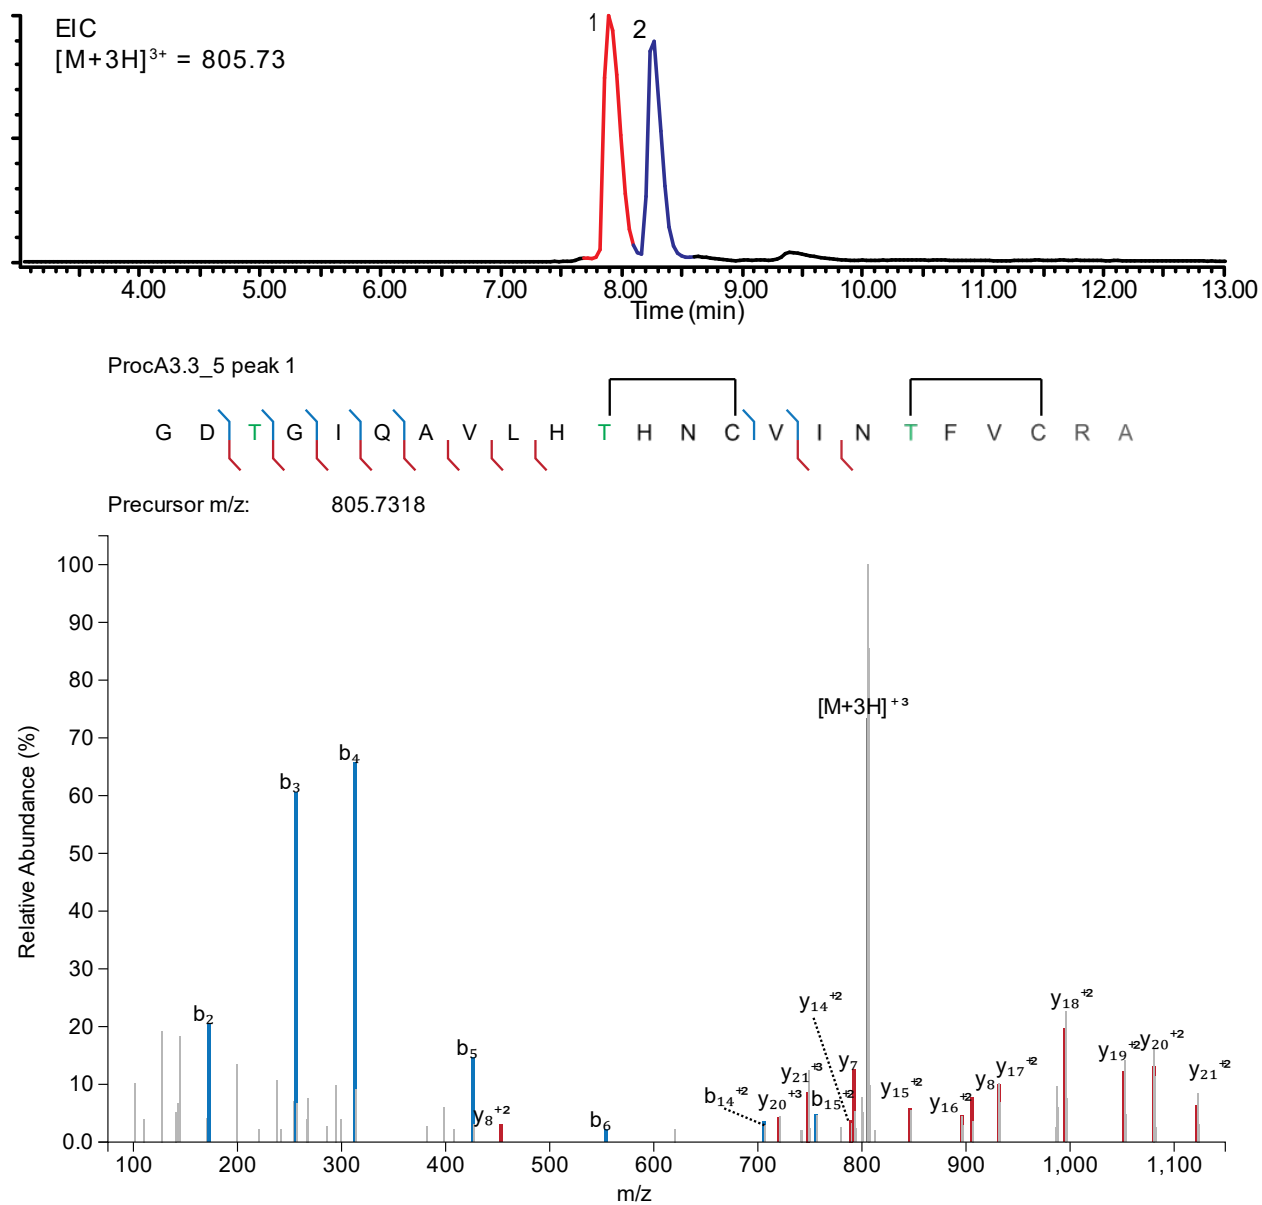



| ion  | charge | Observed mass | Theoretical mass | Error (ppm) |
|------|--------|---------------|------------------|-------------|
| b2   | 1      | 173.0559      | 173.0557         | 1.2686      |
| b3   | 1      | 256.093       | 256.0928         | 0.7974      |
| b4   | 1      | 313.1145      | 313.1143         | 0.7672      |
| b5   | 1      | 426.1981      | 426.1983         | -0.5157     |
| y8   | 2      | 453.2446      | 453.2367         | 17.363      |
| b6   | 1      | 554.2565      | 554.2569         | -0.7213     |
| b14  | 2      | 706.3304      | 706.3304         | -0.0139     |
| y20  | 3      | 720.7029      | 720.7033         | -0.5544     |
| y21  | 3      | 748.3822      | 748.3823         | -0.1844     |
| b15  | 2      | 755.8639      | 755.8646         | -0.9483     |
| y14  | 2      | 789.8733      | 789.8745         | -1.4751     |
| y7   | 1      | 792.3811      | 792.3821         | -1.2929     |
| M+3H | 3      | 805.7322      | 805.7318         | 0.489       |
| y15  | 2      | 846.4149      | 846.4165         | -1.8846     |
| y16  | 2      | 895.9498      | 895.9507         | -1.0069     |
| y8   | 1      | 905.4654      | 905.4662         | -0.8664     |
| y17  | 2      | 931.4687      | 931.4693         | -0.6003     |
| y18  | 2      | 995.4976      | 995.4985         | -0.9534     |
| y19  | 2      | 1052.0393     | 1052.0406        | -1.2159     |
| y20  | 2      | 1080.5502     | 1080.5513        | -1.0283     |
| y21  | 2      | 1122.0693     | 1122.0699        | -0.5069     |

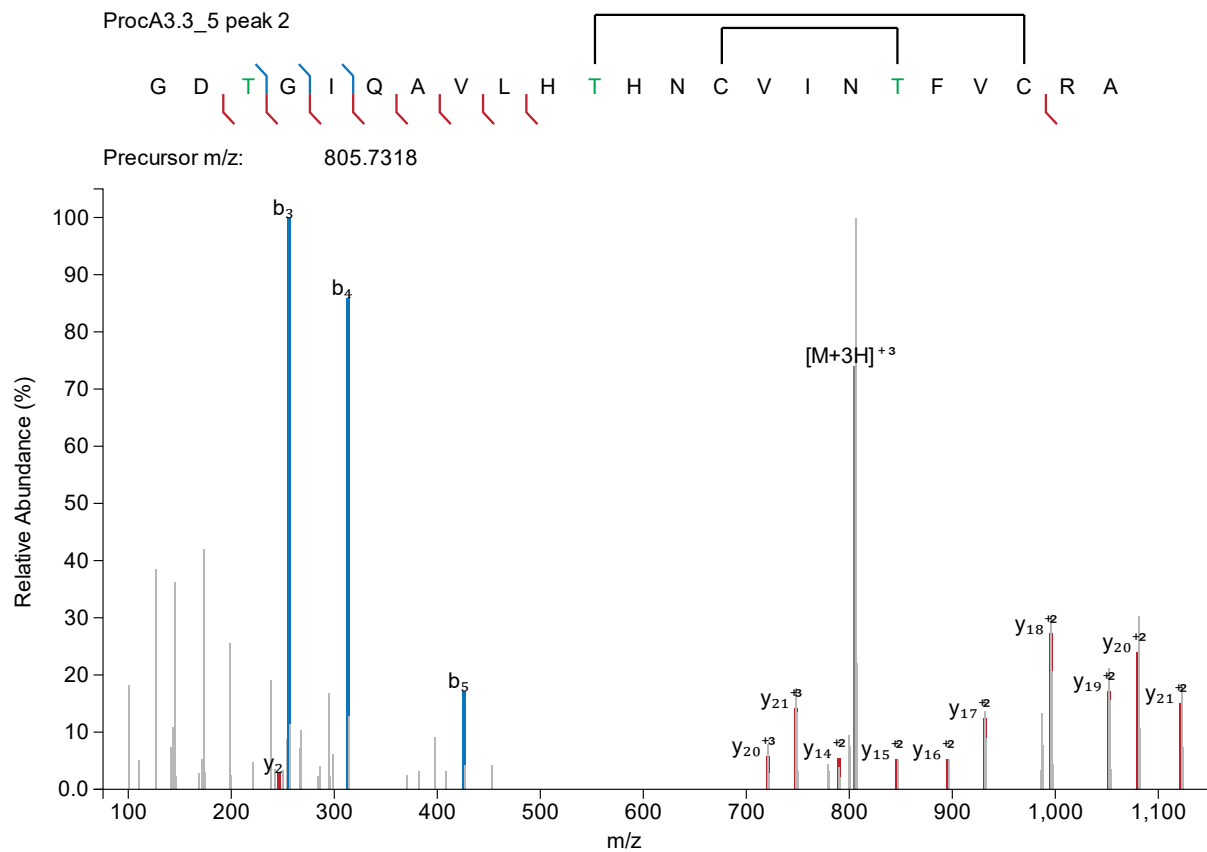

| <b>ion</b> | <b>charge</b> | <b>Observed mass</b> | <b>Theoretical mass</b> | <b>Error (ppm)</b> |
|------------|---------------|----------------------|-------------------------|--------------------|
| y2         | 1             | 246.1604             | 246.1561                | 17.6102            |
| b3         | 1             | 256.0971             | 256.0928                | 16.8073            |
| b4         | 1             | 313.118              | 313.1143                | 11.9452            |
| b5         | 1             | 426.2004             | 426.1983                | 4.8809             |
| y20        | 3             | 720.7004             | 720.7033                | -4.0233            |
| y21        | 3             | 748.3791             | 748.3823                | -4.3267            |
| y14        | 2             | 789.8696             | 789.8745                | -6.1594            |
| M+3H       | 3             | 805.7283             | 805.7318                | -4.3513            |
| y15        | 2             | 846.4107             | 846.4165                | -6.8467            |
| y16        | 2             | 895.9447             | 895.9507                | -6.6992            |
| y17        | 2             | 931.4619             | 931.4693                | -7.9006            |
| y18        | 2             | 995.4902             | 995.4985                | -8.3869            |
| y19        | 2             | 1052.031             | 1052.041                | -8.9152            |
| y20        | 2             | 1080.541             | 1080.551                | -9.7276            |
| y21        | 2             | 1122.059             | 1122.07                 | -9.8646            |

**Figure S6.** LC-ESI-MS/MS analysis of ProcA3.3\_6 modified by ProcM. (Top) extracted ion chromatogram for the selected parent ion  $[M+3H]^{3+}$ ; product with overlapping rings is shown in blue and product with non-overlapping rings is shown in red; (Middle) MS/MS spectrum with b- (blue) and y- (red) ion fragments. For clarity these peaks are boldened and colored. The height of the colored blue and red ions reflects the intensity of the ion; sometimes a grey ion appears to be within the bolded (widened) red and blue peaks; these correspond to the isotopic peaks of the matched fragments. (Bottom) list of matched fragment ions showing theoretical masses, charge states, and mass error (ppm).

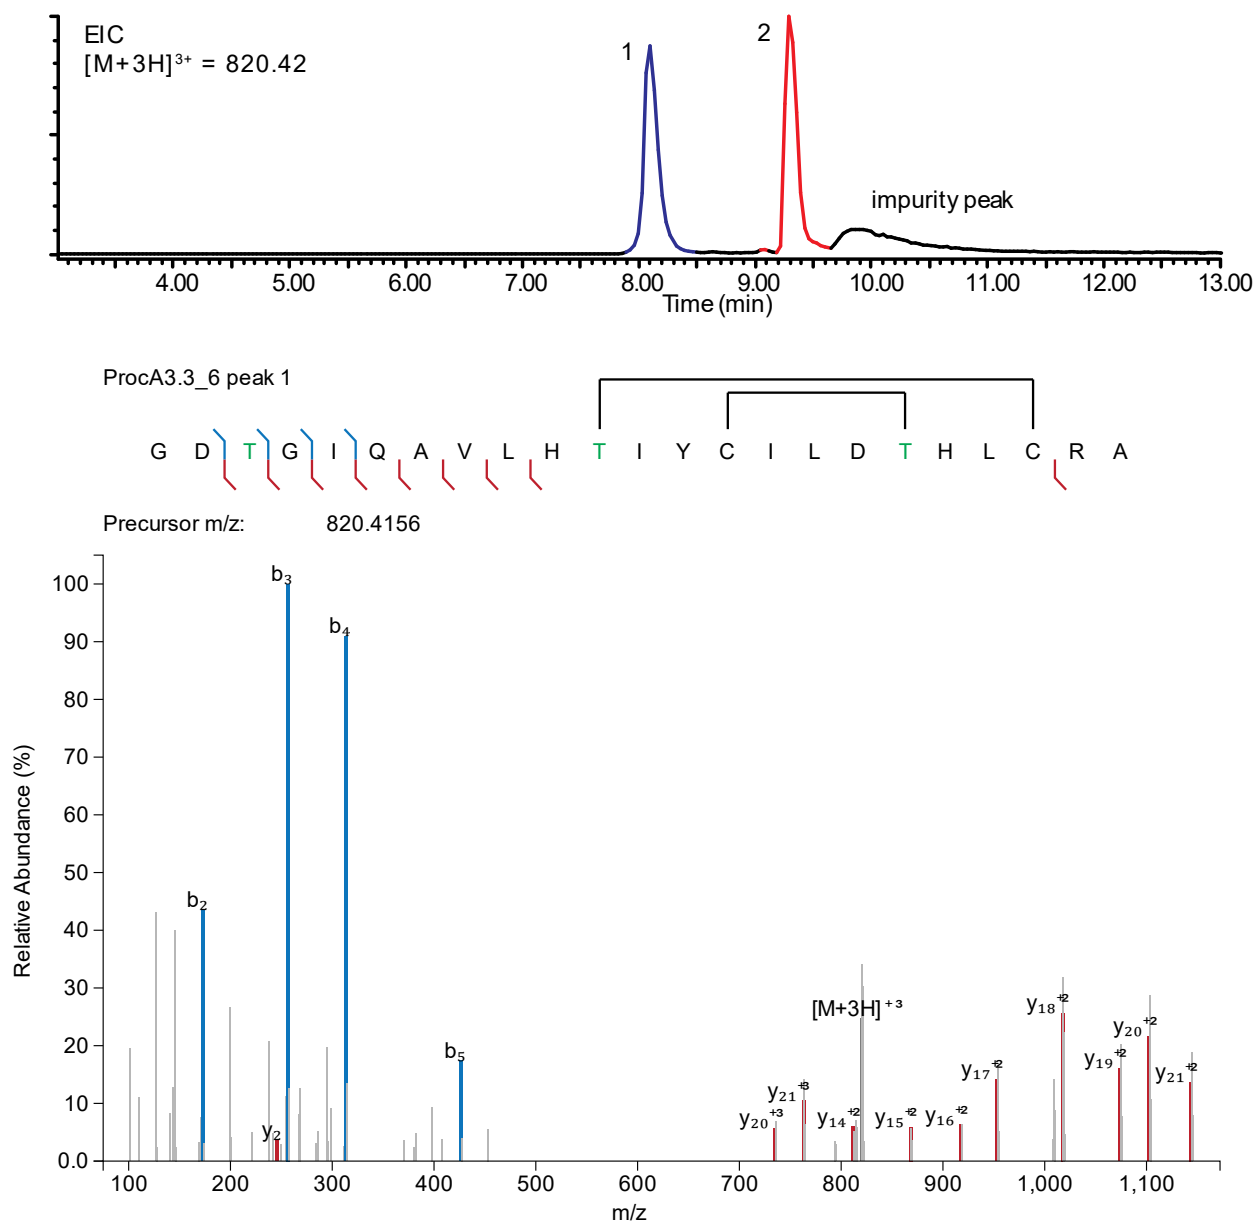

| ion | charge | Observed mass | Theoretical mass | Error (ppm) |
|-----|--------|---------------|------------------|-------------|
| b2  | 1      | 173.0557      | 173.0557         | 0.1129      |
| y2  | 1      | 246.1559      | 246.1561         | -0.6709     |
| b3  | 1      | 256.0928      | 256.0928         | 0.0165      |
| b4  | 1      | 313.1142      | 313.1143         | -0.1909     |

|      |   |          |          |         |
|------|---|----------|----------|---------|
| b5   | 1 | 426.1978 | 426.1983 | -1.2196 |
| y20  | 3 | 735.3856 | 735.3871 | -2.0174 |
| y21  | 3 | 763.0645 | 763.0661 | -2.1256 |
| y14  | 2 | 811.8981 | 811.9001 | -2.514  |
| M+3H | 3 | 820.4143 | 820.4156 | -1.5724 |
| y15  | 2 | 868.4397 | 868.4422 | -2.8455 |
| y16  | 2 | 917.9735 | 917.9764 | -3.1353 |
| y17  | 2 | 953.4922 | 953.4949 | -2.8685 |
| y18  | 2 | 1017.522 | 1017.524 | -2.6782 |
| y19  | 2 | 1074.064 | 1074.066 | -2.3789 |
| y20  | 2 | 1102.574 | 1102.577 | -2.5278 |
| y21  | 2 | 1144.093 | 1144.096 | -2.3117 |

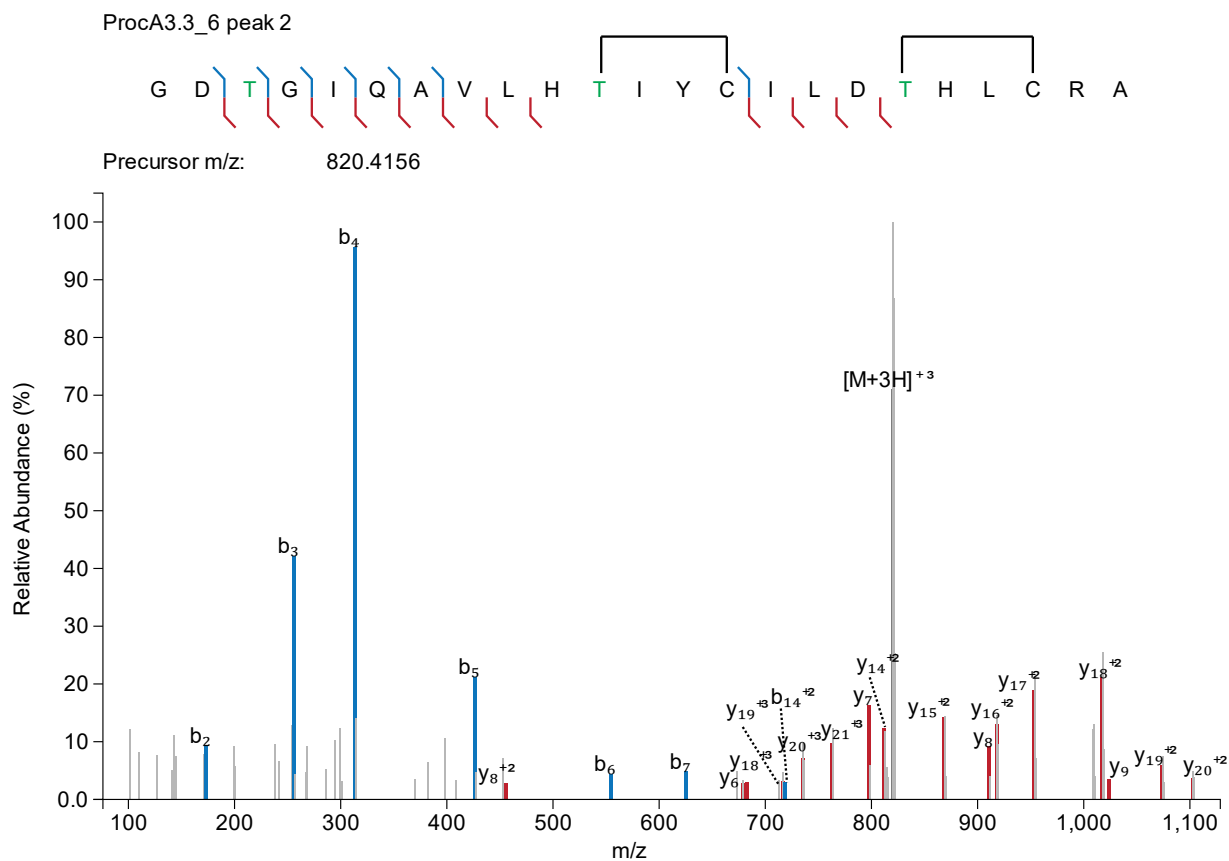

| ion | charge | Observed mass | Theoretical mass | Error (ppm) |
|-----|--------|---------------|------------------|-------------|
| b2  | 1      | 173.0554      | 173.0557         | -1.6207     |
| b3  | 1      | 256.0918      | 256.0928         | -3.8884     |
| b4  | 1      | 313.113       | 313.1143         | -4.0234     |
| b5  | 1      | 426.1956      | 426.1983         | -6.3815     |
| y8  | 2      | 455.729       | 455.7318         | -6.1625     |
| b6  | 1      | 554.2523      | 554.2569         | -8.299      |
| b7  | 1      | 625.2889      | 625.294          | -8.1782     |
| y18 | 3      | 678.6796      | 678.6852         | -8.3135     |
| y6  | 1      | 682.3387      | 682.3453         | -9.7318     |

|      |   |          |          |          |
|------|---|----------|----------|----------|
| y19  | 3 | 716.3734 | 716.3799 | -9.1137  |
| b14  | 2 | 718.847  | 718.8532 | -8.6037  |
| y20  | 3 | 735.381  | 735.3871 | -8.2726  |
| y21  | 3 | 763.0595 | 763.0661 | -8.6782  |
| y7   | 1 | 797.3648 | 797.3723 | -9.3814  |
| y14  | 2 | 811.8923 | 811.9001 | -9.6577  |
| M+3H | 3 | 820.409  | 820.4156 | -8.0325  |
| y15  | 2 | 868.4342 | 868.4422 | -9.1786  |
| y8   | 1 | 910.4475 | 910.4563 | -9.7099  |
| y16  | 2 | 917.9679 | 917.9764 | -9.2357  |
| y17  | 2 | 953.4859 | 953.4949 | -9.4758  |
| y18  | 2 | 1017.514 | 1017.524 | -9.8525  |
| y9   | 1 | 1023.529 | 1023.54  | -10.8452 |
| y19  | 2 | 1074.055 | 1074.066 | -10.1066 |
| y20  | 2 | 1074.055 | 1074.066 | -10.1066 |

**Figure S7.** LC-ESI-MS/MS analysis of ProcA3.3\_7 modified by ProcM. (Top) extracted ion chromatogram (EIC) for the selected parent ion  $[M+3H]^{3+}$ ; product with non-overlapping rings is shown in red. (Middle) MS/MS spectrum with b- (blue) and y- (red) ion fragments. For clarity these peaks are boldened and colored. The height of the colored blue and red ions reflects the intensity of the ion; sometimes a grey ion appears to be within the bolded (widened) red and blue peaks; these correspond to the isotopic peaks of the matched fragments. (Bottom) list of matched fragment ions showing theoretical masses, charge states, and mass error (ppm).

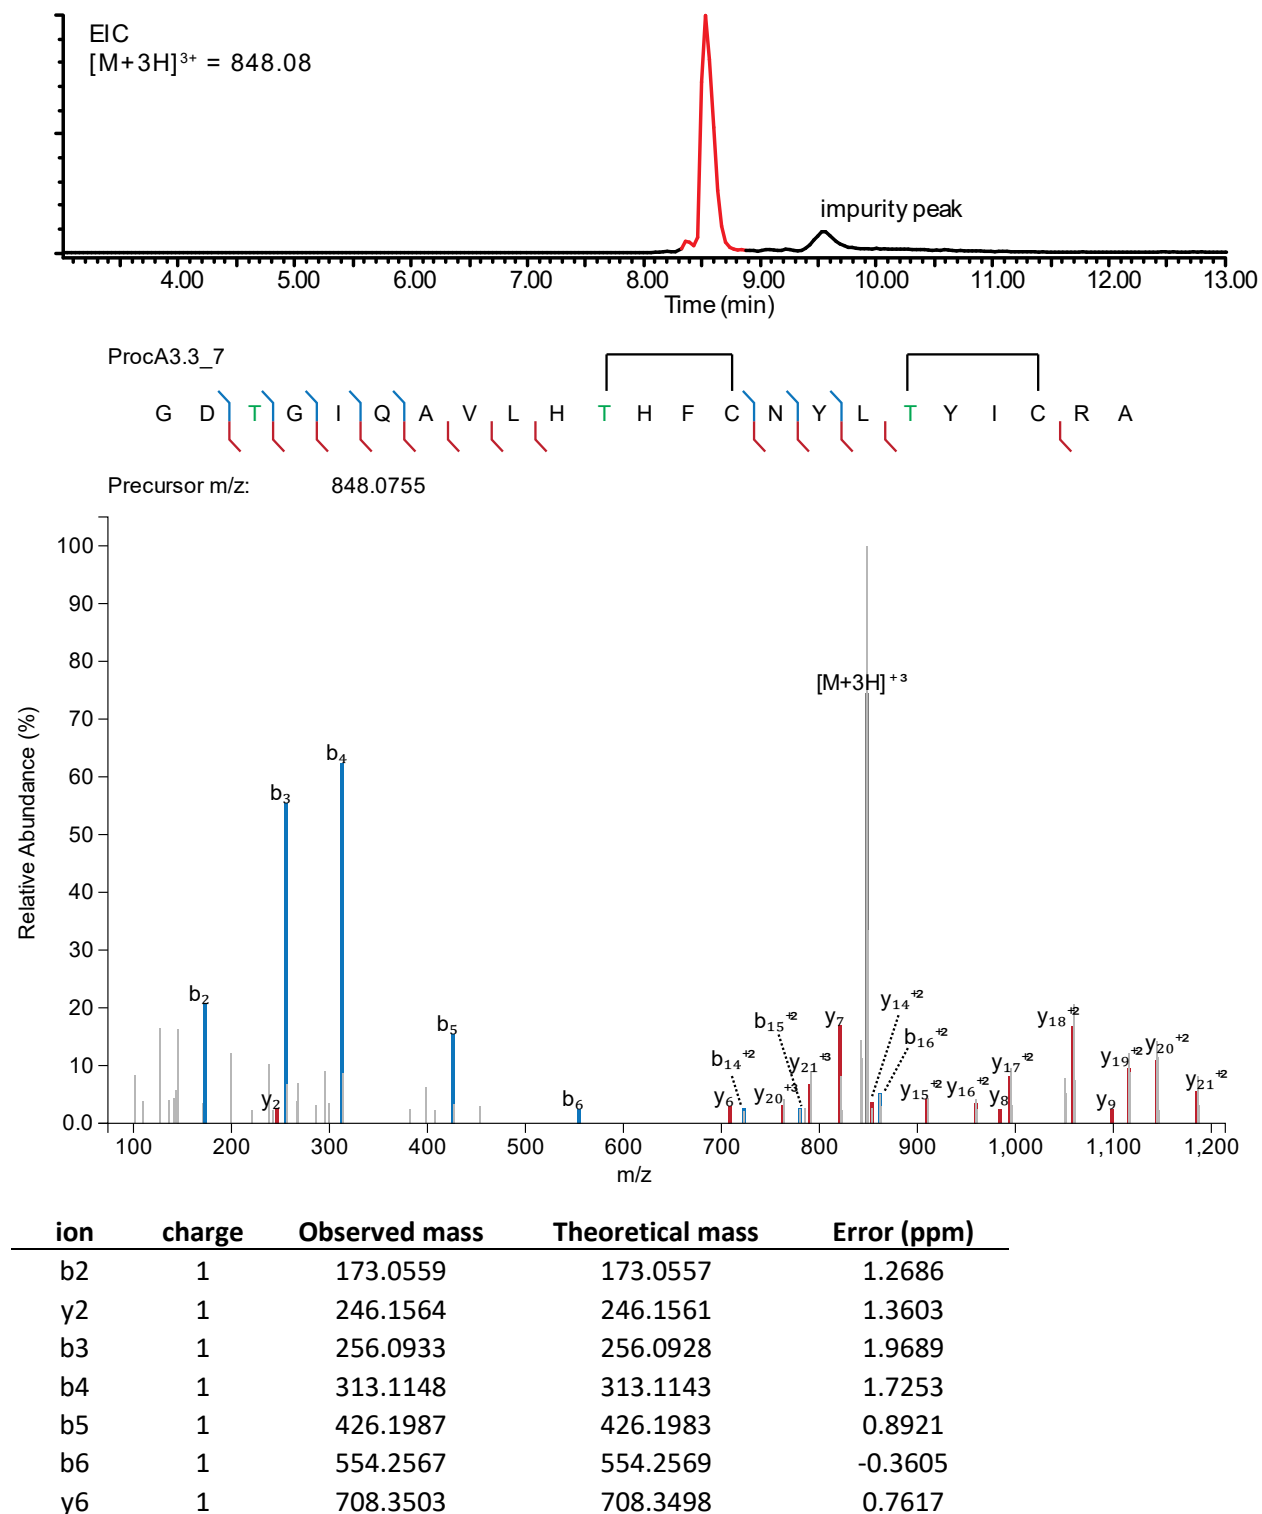

|      |   |          |          |         |
|------|---|----------|----------|---------|
| b14  | 2 | 722.8438 | 722.8431 | 0.8995  |
| y20  | 3 | 763.0474 | 763.047  | 0.5851  |
| b15  | 2 | 779.8657 | 779.8646 | 1.3915  |
| y21  | 3 | 790.7269 | 790.726  | 1.1483  |
| y7   | 1 | 821.4343 | 821.4338 | 0.5838  |
| M+3H | 3 | 848.078  | 848.0755 | 2.995   |
| y14  | 2 | 853.3898 | 853.3899 | -0.1712 |
| b16  | 2 | 861.3967 | 861.3963 | 0.4878  |
| y15  | 2 | 909.9322 | 909.932  | 0.246   |
| y16  | 2 | 959.4665 | 959.4662 | 0.3303  |
| y8   | 1 | 984.4978 | 984.4972 | 0.6598  |
| y17  | 2 | 994.9856 | 994.9847 | 0.8642  |
| y18  | 2 | 1059.015 | 1059.014 | 0.9158  |
| y9   | 1 | 1098.54  | 1098.54  | 0.1088  |
| y19  | 2 | 1115.557 | 1115.556 | 0.9322  |
| y20  | 2 | 1144.068 | 1144.067 | 0.9684  |
| y21  | 2 | 1144.068 | 1144.067 | 0.9684  |

**Figure S8.** LC-ESI-MS/MS analysis of ProcA3.3\_8 modified by ProcM. (top) extracted ion chromatogram for the selected parent ion  $[M+3H]^{3+}$ ; product with non-overlapping rings is shown in red; (middle) MS/MS spectrum with b- (blue) and y- (red) ion fragments. (bottom) list of matched fragment ions showing theoretical masses, charge states, and mass error (ppm).

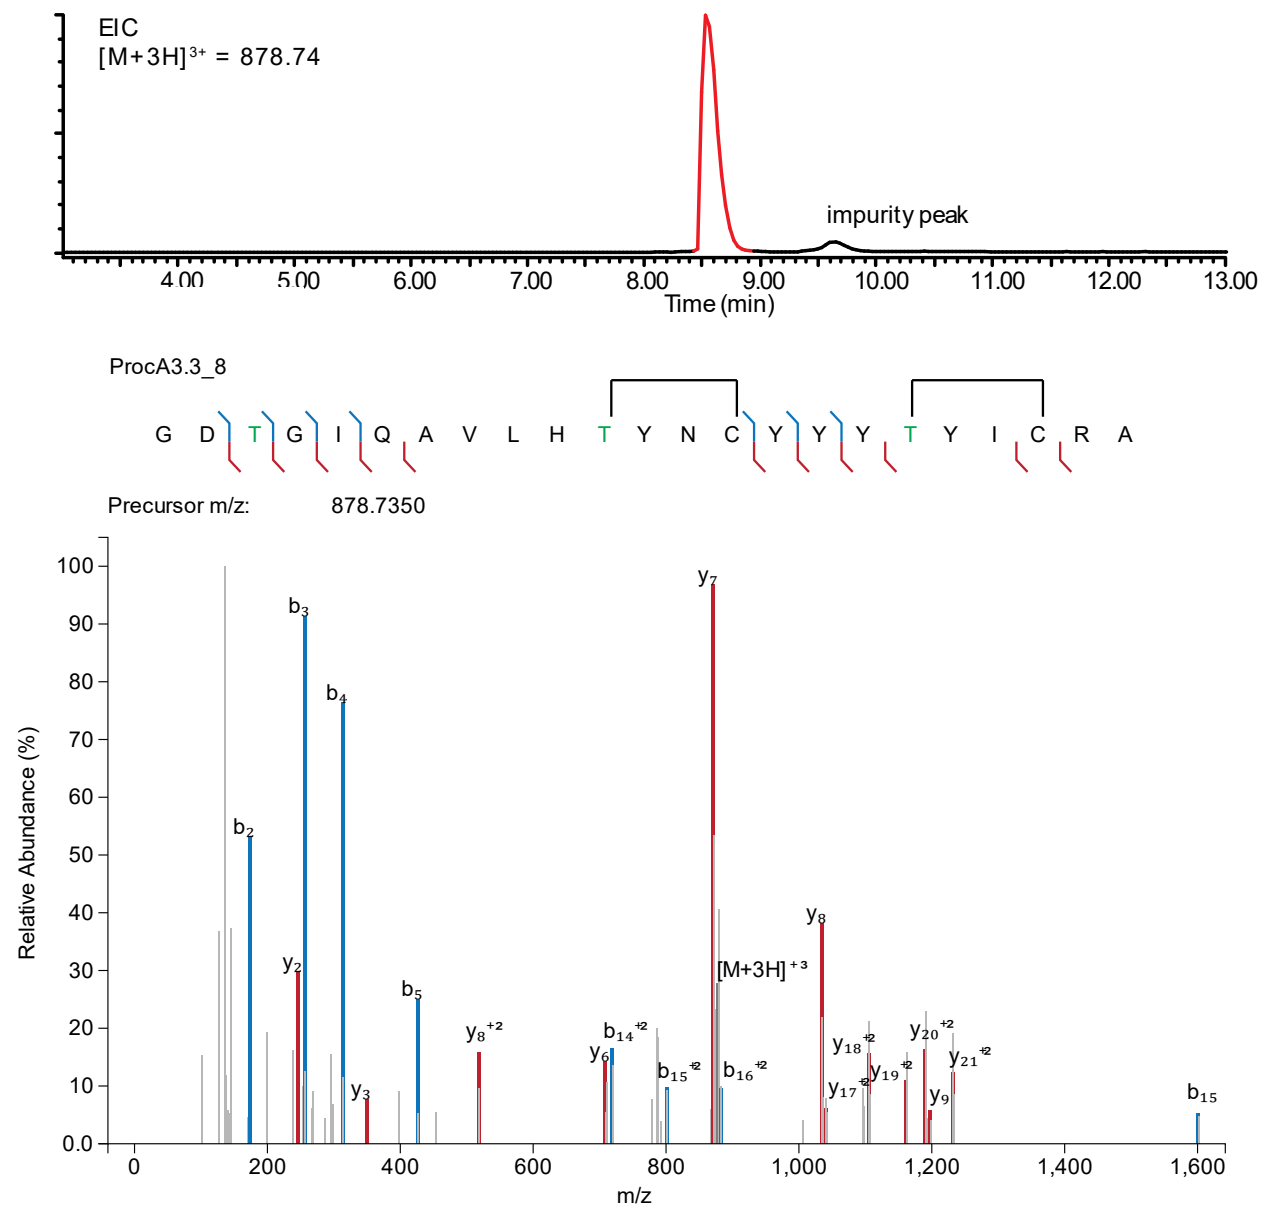

| ion | charge | Observed mass | Theoretical mass | Error (ppm) |
|-----|--------|---------------|------------------|-------------|
| b2  | 1      | 173.0558      | 173.0557         | 0.6907      |
| y2  | 1      | 246.1562      | 246.1561         | 0.5478      |
| b3  | 1      | 256.0933      | 256.0928         | 1.9689      |
| b4  | 1      | 313.1147      | 313.1143         | 1.4059      |
| y3  | 1      | 349.1651      | 349.1653         | -0.4443     |
| b5  | 1      | 426.1983      | 426.1983         | -0.0464     |
| y8  | 2      | 517.7419      | 517.7418         | 0.0995      |
| y6  | 1      | 708.3496      | 708.3498         | -0.2265     |
| b14 | 2      | 719.3328      | 719.3326         | 0.2505      |



|      |   |          |          |         |
|------|---|----------|----------|---------|
| b15  | 2 | 800.8642 | 800.8643 | -0.1059 |
| y7   | 1 | 871.4147 | 871.4131 | 1.847   |
| M+3H | 3 | 878.7364 | 878.735  | 1.597   |
| b16  | 2 | 882.3961 | 882.3959 | 0.1702  |
| y8   | 1 | 1034.477 | 1034.476 | 0.7536  |
| y17  | 2 | 1040.975 | 1040.974 | 0.437   |
| y18  | 2 | 1105.004 | 1105.003 | 0.9637  |
| y19  | 2 | 1161.547 | 1161.545 | 0.977   |
| y20  | 2 | 1190.057 | 1190.056 | 0.9267  |
| y9   | 1 | 1197.54  | 1197.54  | 0.3754  |
| y21  | 2 | 1231.576 | 1231.575 | 0.9299  |
| b15  | 1 | 1600.722 | 1600.721 | 0.4416  |

**Figure S9.** LC-ESI-MS/MS analysis of ProcA3.3\_9 modified by ProcM. (top) extracted ion chromatogram for the selected parent ion  $[M+3H]^{3+}$ ; (middle) MS/MS spectrum with b- (blue) and y- (red) ion fragments; (bottom) list of matched fragment ions showing theoretical masses, charge states, and mass error (ppm).

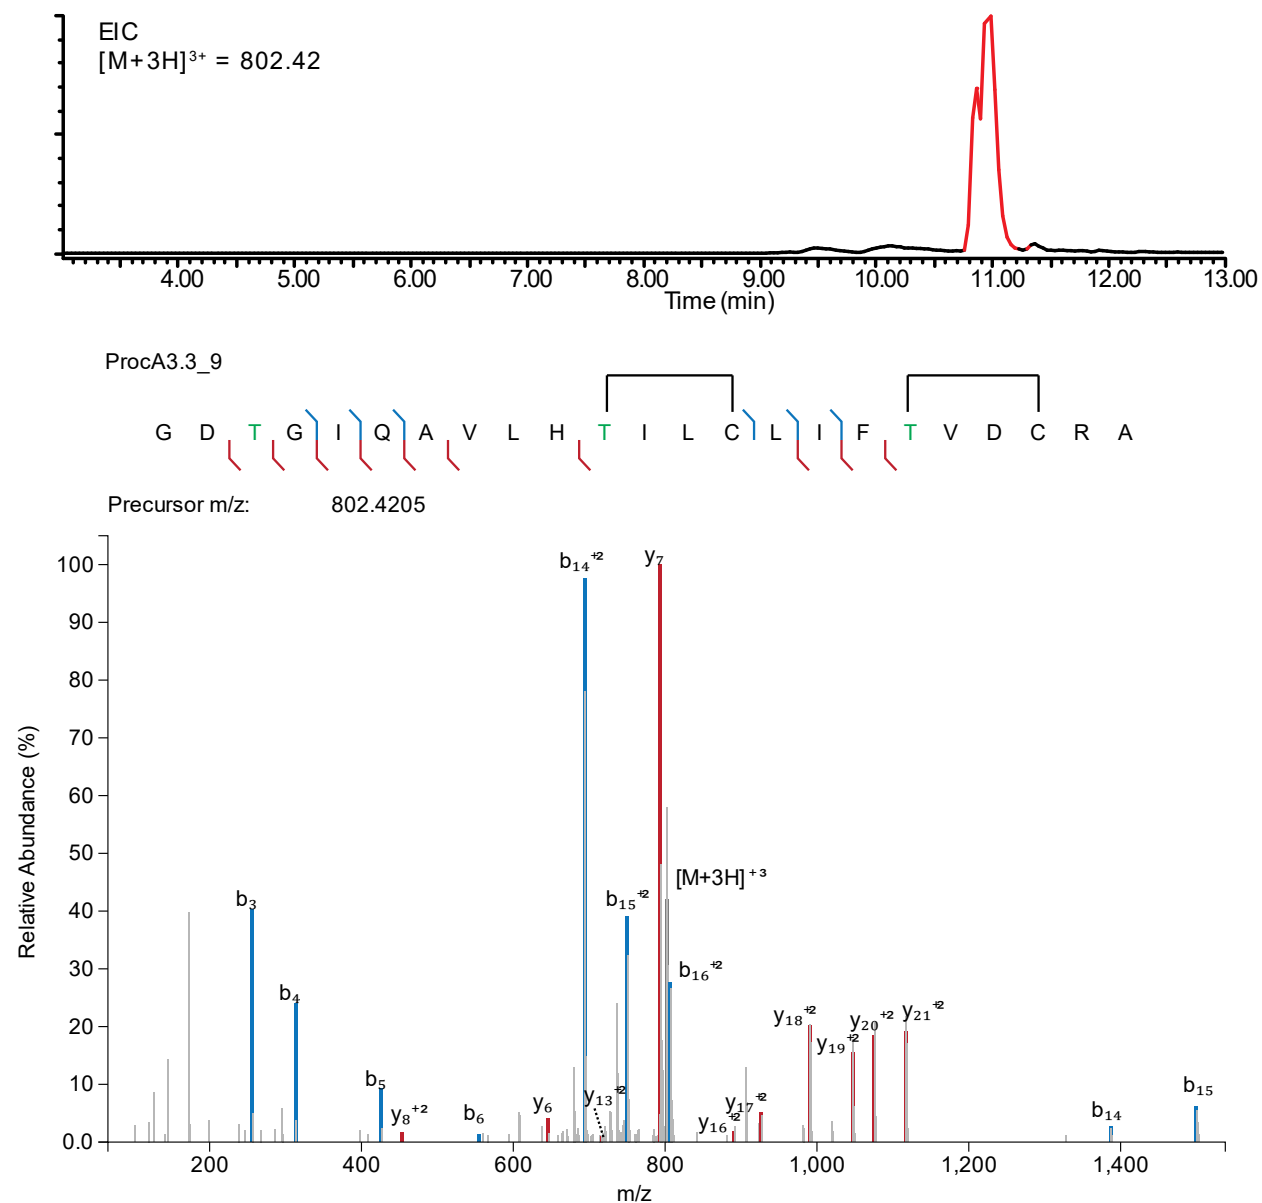

| ion | charge | Observed mass | Theoretical mass | Error (ppm) |
|-----|--------|---------------|------------------|-------------|
| b3  | 1      | 256.0905      | 256.0928         | -8.924      |
| b4  | 1      | 313.1135      | 313.1143         | -2.5271     |
| b5  | 1      | 426.1998      | 426.1983         | 3.4862      |
| y8  | 2      | 453.7282      | 453.7287         | -1.1976     |
| b6  | 1      | 554.2609      | 554.2569         | 7.2153      |
| y6  | 1      | 646.3068      | 646.2977         | 13.9806     |
| b14 | 2      | 693.8617      | 693.8635         | -2.7293     |
| y13 | 2      | 716.3757      | 716.378          | -3.1454     |
| b15 | 2      | 750.4041      | 750.4056         | -1.9694     |

|      |   |          |          |         |
|------|---|----------|----------|---------|
| y7   | 1 | 793.3725 | 793.3661 | 7.9725  |
| M+3H | 3 | 802.413  | 802.4205 | -9.2612 |
| b16  | 2 | 806.9528 | 806.9476 | 6.377   |
| y16  | 2 | 890.9796 | 890.9837 | -4.6057 |
| y17  | 2 | 926.4964 | 926.5022 | -6.339  |
| y18  | 2 | 990.5345 | 990.5315 | 2.9917  |
| y19  | 2 | 1047.077 | 1047.074 | 2.781   |
| y20  | 2 | 1075.586 | 1075.584 | 1.6864  |
| y21  | 2 | 1117.103 | 1117.103 | -0.3185 |
| b14  | 1 | 1386.718 | 1386.72  | -1.6846 |
| b15  | 1 | 1499.806 | 1499.804 | 1.1841  |

**Figure S10.** LC-ESI-MS/MS analysis of ProcA3.3\_10 modified by ProcM. (Top) Extracted ion chromatogram for the selected parent ion  $[M+3H]^{3+}$ . (Middle) MS/MS spectrum with b- (blue) and y- (red) ion fragments. (Bottom) list of matched fragment ions showing theoretical masses, charge states, and mass error (ppm).

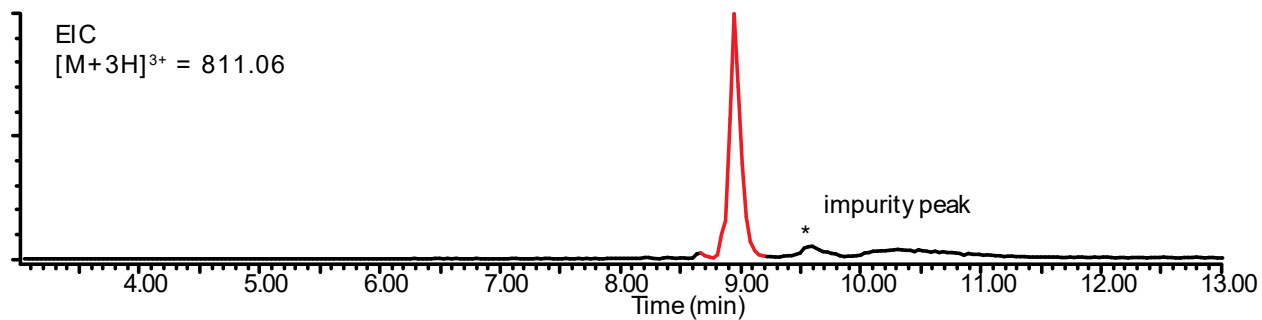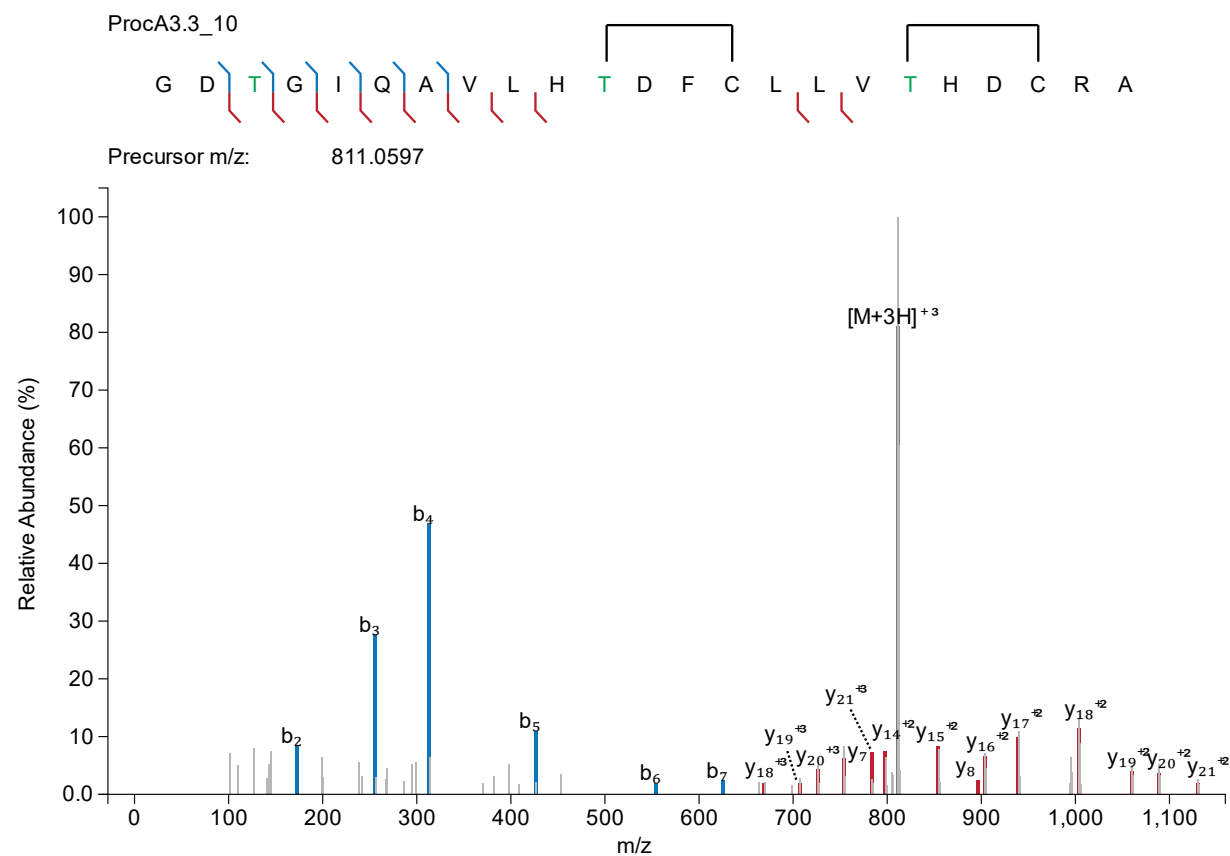

| ion | charge | Observed mass | Theoretical mass | Error (ppm) |
|-----|--------|---------------|------------------|-------------|
| b2  | 1      | 173.0559      | 173.0557         | 1.2686      |
| b3  | 1      | 256.0931      | 256.0928         | 1.1879      |
| b4  | 1      | 313.1147      | 313.1143         | 1.4059      |
| b5  | 1      | 426.1988      | 426.1983         | 1.1267      |
| b6  | 1      | 554.2573      | 554.2569         | 0.7221      |
| b7  | 1      | 625.2952      | 625.294          | 1.8971      |
| y18 | 3      | 669.3304      | 669.3293         | 1.5734      |
| y19 | 3      | 707.0255      | 707.024          | 2.0741      |
| y20 | 3      | 726.0324      | 726.0312         | 1.669       |
| y21 | 3      | 753.7115      | 753.7102         | 1.6894      |

|      |   |          |          |        |
|------|---|----------|----------|--------|
| y7   | 1 | 783.3571 | 783.3566 | 0.5943 |
| y14  | 2 | 797.8674 | 797.8663 | 1.381  |
| M+3H | 3 | 811.0635 | 811.0597 | 4.6918 |
| y15  | 2 | 854.4098 | 854.4083 | 1.7227 |
| y8   | 1 | 896.4414 | 896.4407 | 0.787  |
| y16  | 2 | 903.9441 | 903.9425 | 1.7312 |
| y17  | 2 | 939.4625 | 939.4611 | 1.4986 |
| y18  | 2 | 1003.492 | 1003.49  | 1.8116 |
| y19  | 2 | 1060.034 | 1060.032 | 1.4979 |
| y20  | 2 | 1088.545 | 1088.543 | 1.5212 |
| y21  | 2 | 1130.064 | 1130.062 | 2.1222 |

**Figure S11.** LC-ESI-MS/MS analysis of ProcA3.3\_11 modified by ProcM. (top) extracted ion chromatogram for the selected parent ion  $[M+3H]^{3+}$ ; product with overlapping rings is shown in blue and product with non-overlapping rings is shown in red; (middle) MS/MS spectrum with b- (blue) and y- (red) ion fragments. (bottom) list of matched fragment ions showing theoretical masses, charge states, and mass error (ppm).

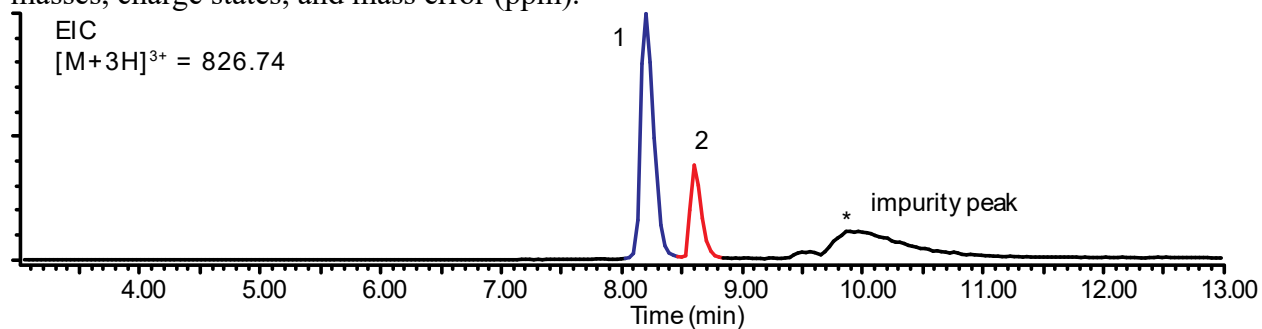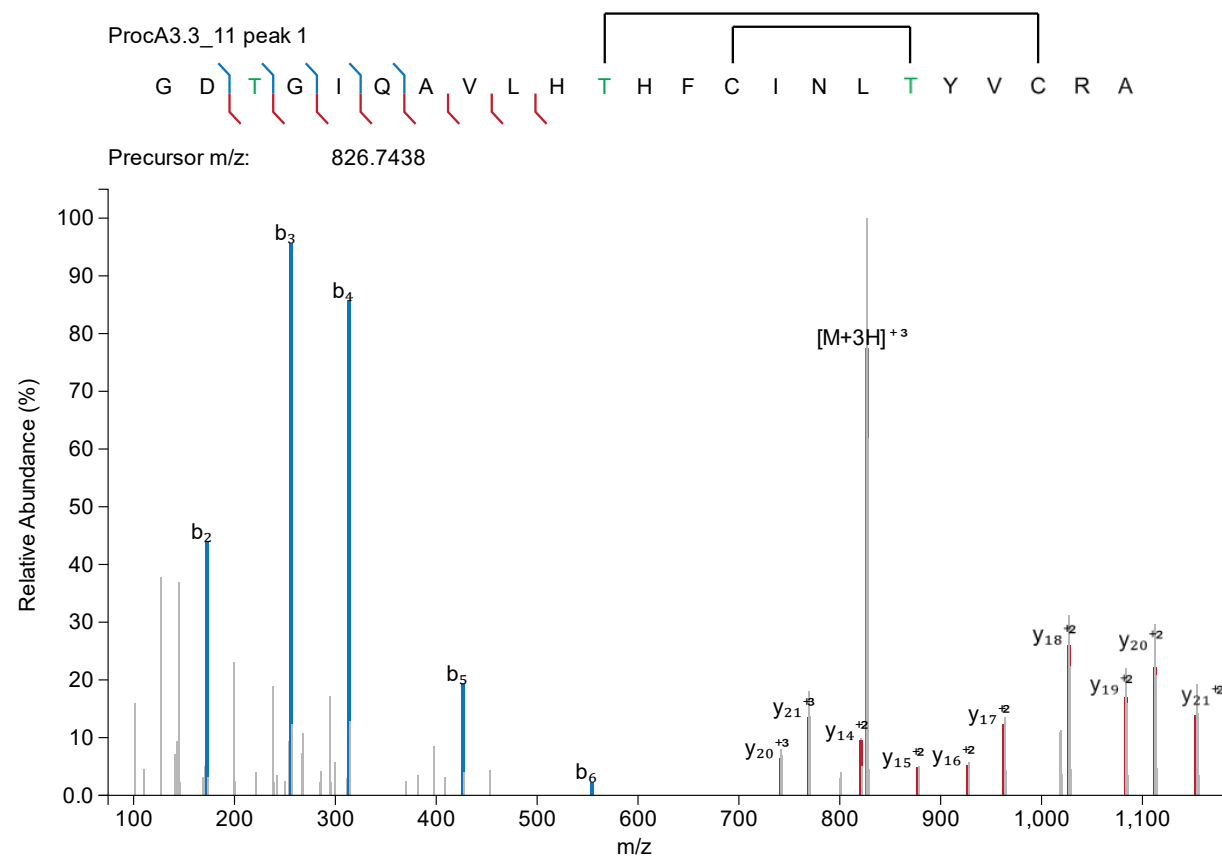

| ion  | charge | Observed mass | Theoretical mass | Error (ppm) |
|------|--------|---------------|------------------|-------------|
| b2   | 1      | 173.0557      | 173.0557         | 0.1129      |
| b3   | 1      | 256.093       | 256.0928         | 0.7974      |
| b4   | 1      | 313.1145      | 313.1143         | 0.7672      |
| b5   | 1      | 426.1983      | 426.1983         | -0.0464     |
| b6   | 1      | 554.2566      | 554.2569         | -0.5409     |
| y20  | 3      | 741.7154      | 741.7153         | 0.1147      |
| y21  | 3      | 769.3947      | 769.3944         | 0.4506      |
| y14  | 2      | 821.4045      | 821.3925         | 14.6238     |
| M+3H | 3      | 826.7459      | 826.7438         | 2.5143      |

|     |   |          |          |         |
|-----|---|----------|----------|---------|
| y15 | 2 | 877.9345 | 877.9345 | -0.0206 |
| y16 | 2 | 927.4686 | 927.4687 | -0.1349 |
| y17 | 2 | 962.9875 | 962.9873 | 0.2262  |
| y18 | 2 | 1027.017 | 1027.017 | 0.514   |
| y19 | 2 | 1083.559 | 1083.559 | 0.6441  |
| y20 | 2 | 1112.07  | 1112.069 | 0.6887  |
| y21 | 2 | 1153.589 | 1153.588 | 0.7873  |

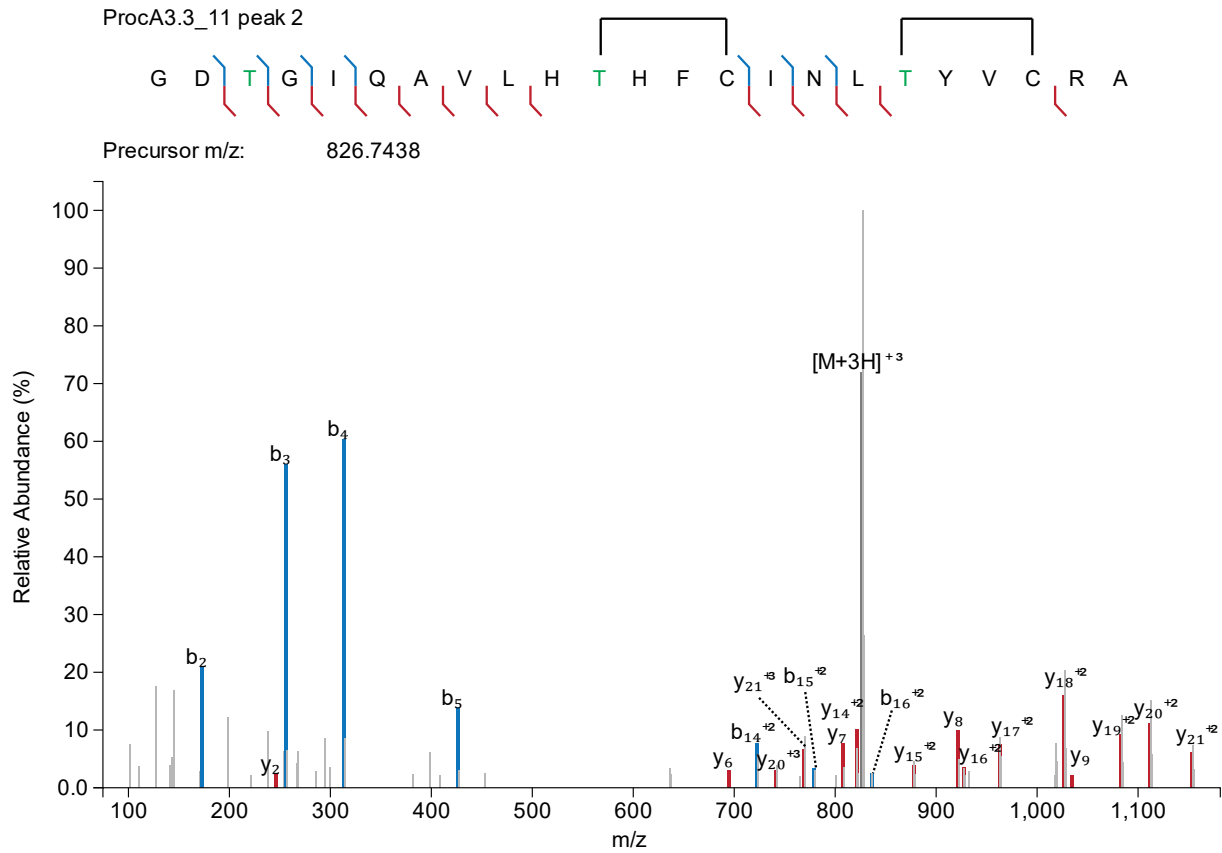

| ion  | charge | Observed mass | Theoretical mass | Error (ppm) |
|------|--------|---------------|------------------|-------------|
| b2   | 1      | 173.0555      | 173.0557         | -1.0428     |
| y2   | 1      | 246.1556      | 246.1561         | -1.8897     |
| b3   | 1      | 256.0927      | 256.0928         | -0.374      |
| b4   | 1      | 313.1141      | 313.1143         | -0.5103     |
| b5   | 1      | 426.1982      | 426.1983         | -0.281      |
| y6   | 1      | 694.3341      | 694.3341         | -0.0208     |
| b14  | 2      | 722.8427      | 722.8431         | -0.6222     |
| y20  | 3      | 741.7152      | 741.7153         | -0.1549     |
| y21  | 3      | 769.3944      | 769.3944         | 0.0606      |
| b15  | 2      | 779.385       | 779.3852         | -0.2307     |
| y7   | 1      | 807.418       | 807.4182         | -0.2161     |
| y14  | 2      | 821.4036      | 821.3925         | 13.5281     |
| M+3H | 3      | 826.7448      | 826.7438         | 1.1837      |
| b16  | 2      | 836.406       | 836.4066         | -0.7709     |

|     |   |          |          |         |
|-----|---|----------|----------|---------|
| y15 | 2 | 877.9347 | 877.9345 | 0.2072  |
| y8  | 1 | 921.4608 | 921.4611 | -0.3304 |
| y16 | 2 | 927.4689 | 927.4687 | 0.1886  |
| y17 | 2 | 962.9876 | 962.9873 | 0.3301  |
| y18 | 2 | 1027.016 | 1027.017 | -0.3623 |
| y9  | 1 | 1034.545 | 1034.545 | -0.159  |
| y19 | 2 | 1083.559 | 1083.559 | 0.2749  |
| y20 | 2 | 1112.07  | 1112.069 | 0.5088  |
| y21 | 2 | 1153.589 | 1153.588 | 0.6139  |



**Figure S12.** Chiral GC-MS analysis of ProcM-modified ProcA3.3 peptides. Chiral GC-MS analysis of ProcM-modified ProcA3.3\_6 (A,B) and ProcA3.3\_2 (C) core peptide fragments; panel A shows data from peak 1, panel B data for peak 2 of the LC of ProcA3.3\_6. See Materials and Methods for derivatization of the amino acids. For each set of traces, derivatized samples are shown in blue (overlapping ring) and red (non-overlapping) and samples spiked with synthetic standards (DL- or LL-MeLan, as indicated) are shown below in orange and gray, respectively. Traces were selected-ion chromatograms monitoring for  $m/z = 379$ , which corresponds to the characteristic mass fragment for MeLan. Retention times drift slightly and therefore coinjections with authentic standards were used to verify assignments.

**A**

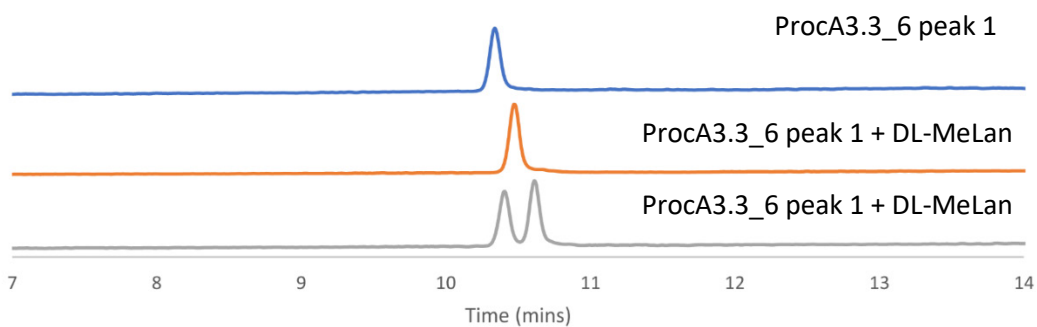

**B**

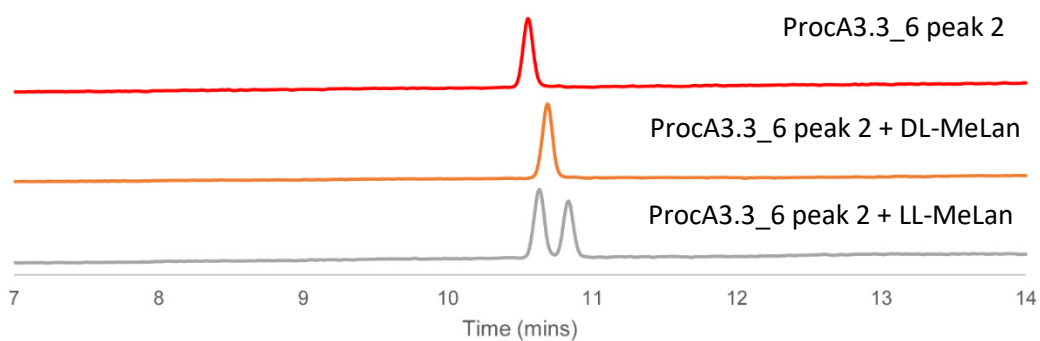

**C**

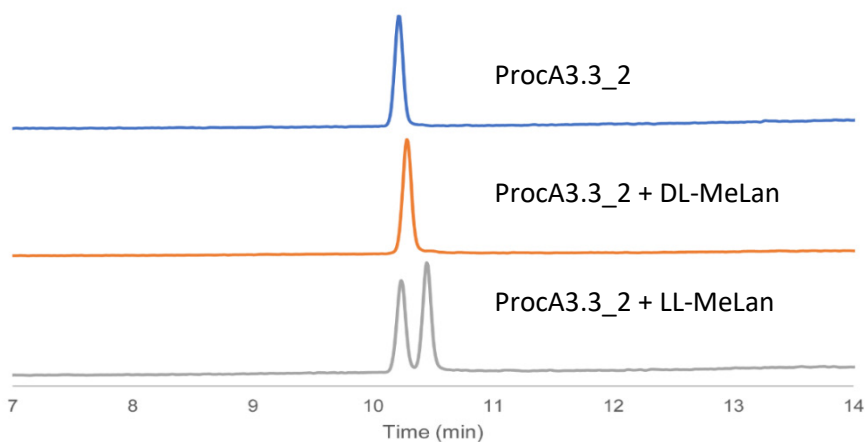

Figure S13. TIMS-MS/MS spectra of ProcM-modified ProcA3.3\_4.

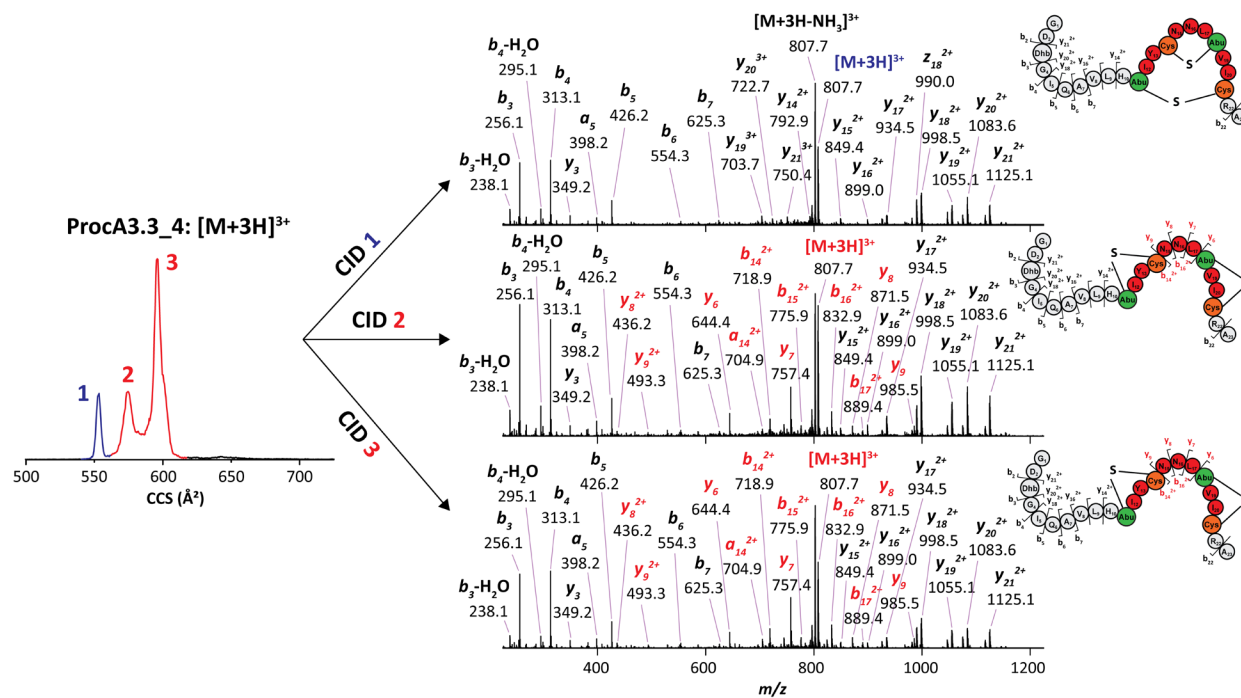



Figure S15. TIMS-MS/MS spectra of ProcM-modified ProcA3.3\_1.

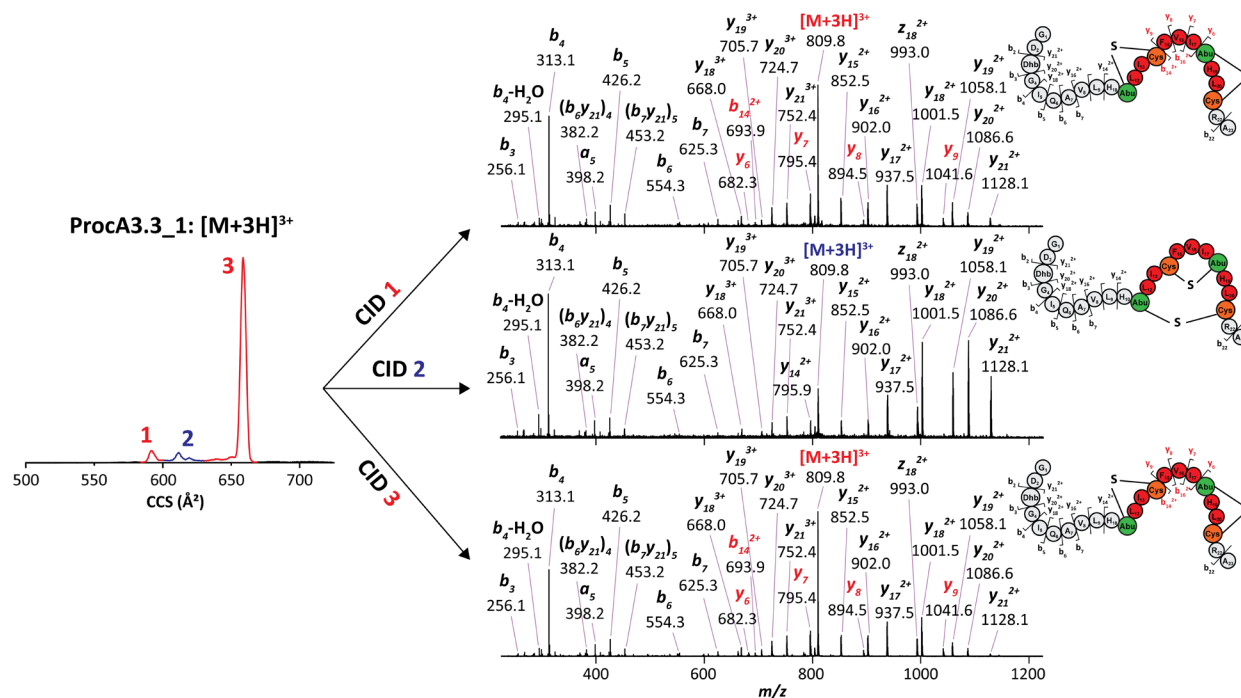

Figure S16. TIMS-MS/MS spectra of ProcM-modified ProcA3.3\_9.

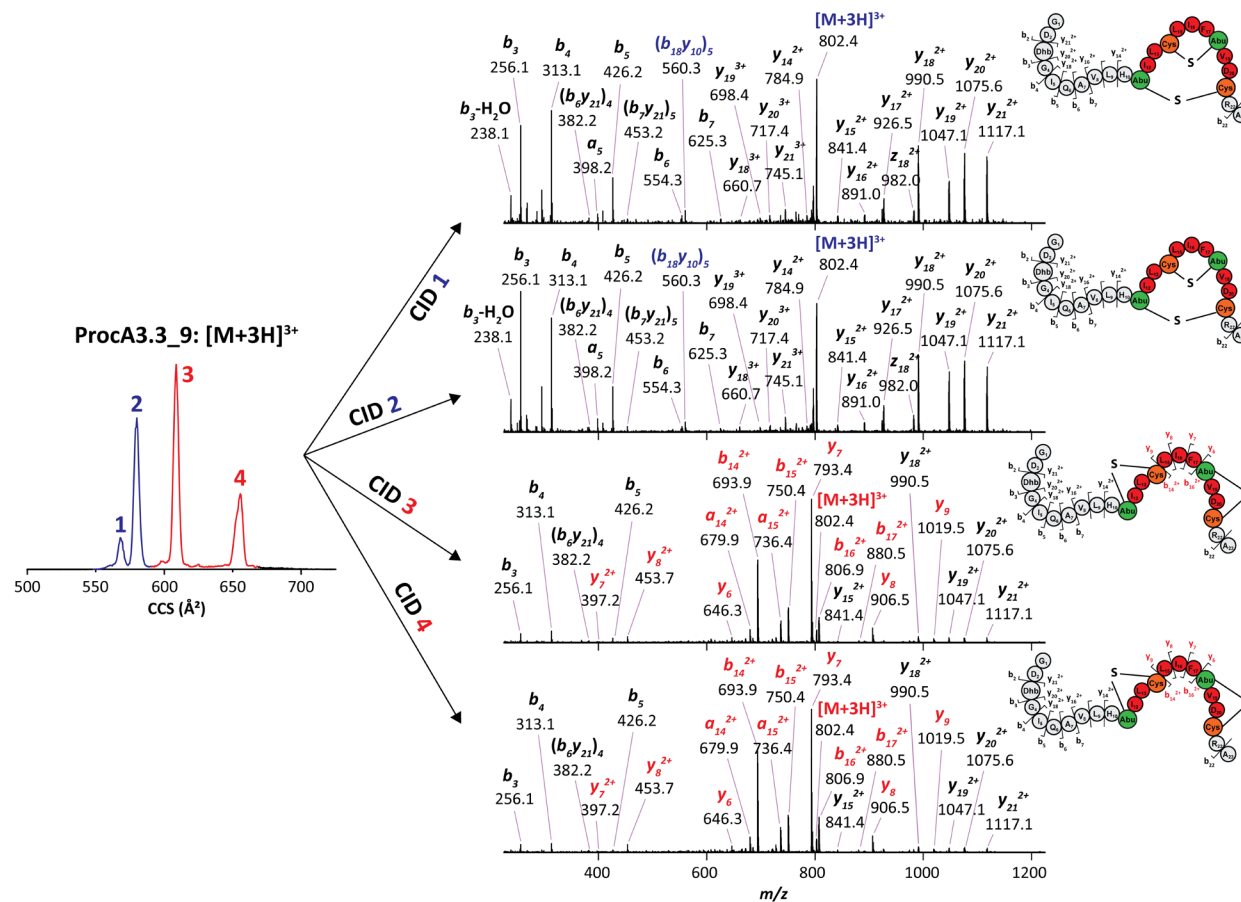

Figure S17. TIMS-MS/MS spectra of ProcM-modified ProcA3.3\_10.

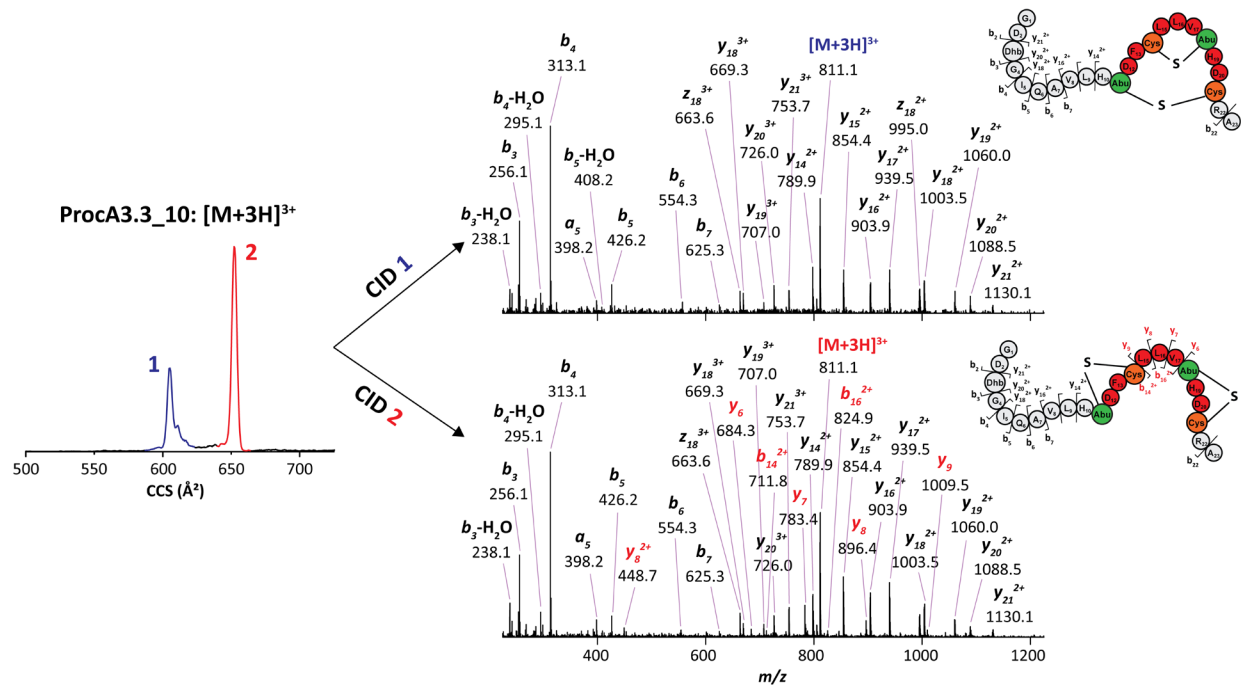

Figure S18. TIMS-MS/MS spectra of ProcM-modified ProcA3.3\_5.

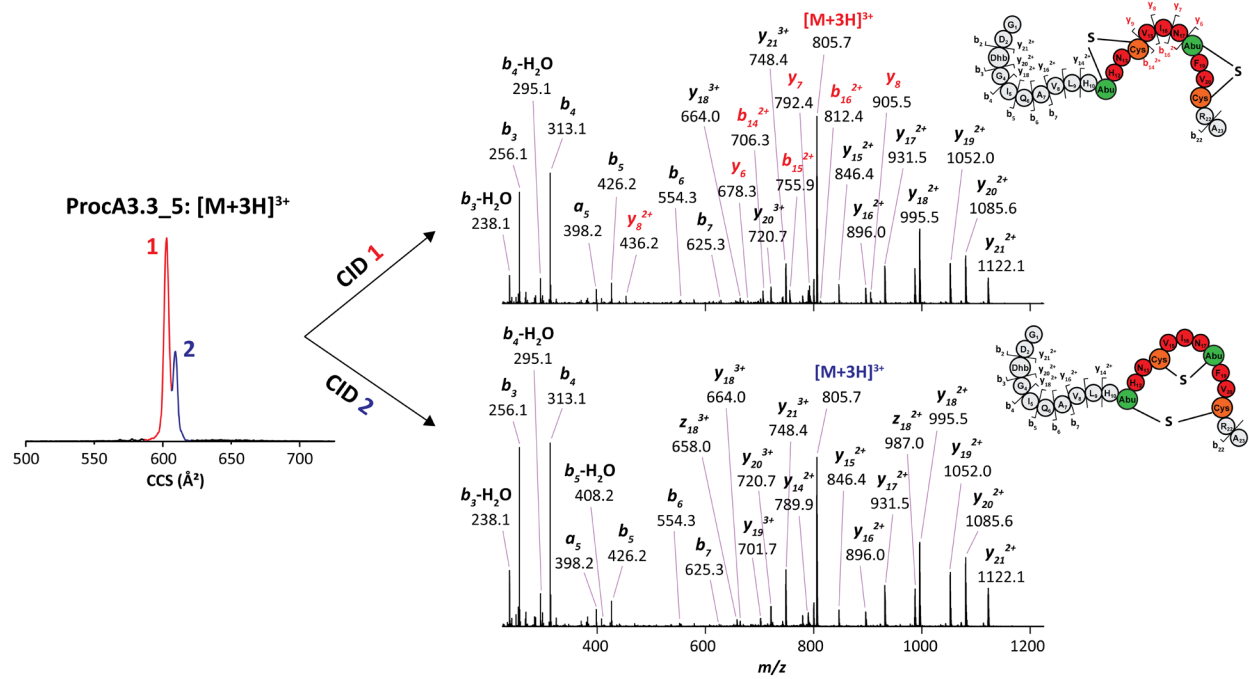

Figure S19. TIMS-MS/MS spectra of ProcM-modified ProcA3.3\_11.

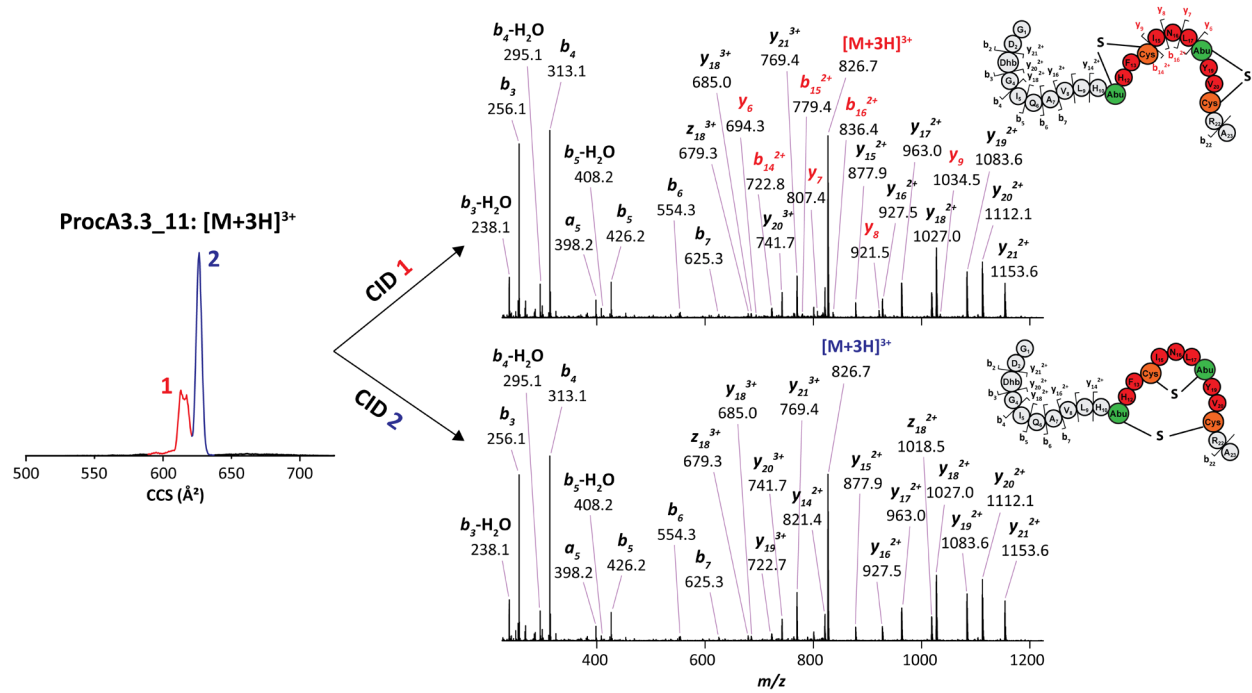

**Figure S20.** Structures of two additional prochlorosins containing two non-overlapping rings. Residues remaining from the leader peptide in prochlorosin 4.3 are indicated in italic font. See also Table 1.

Prochlorosin 1.1

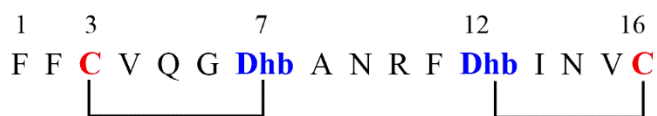

Prochlorosin 4.3

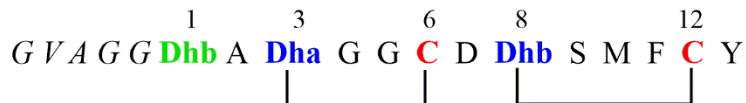

**Figure S21.** Relative energy ( $\Delta E$ ) of the different conformational configurations of each isomer of the analyzed prochlorosins after minimization, ordered from lower to higher energies.

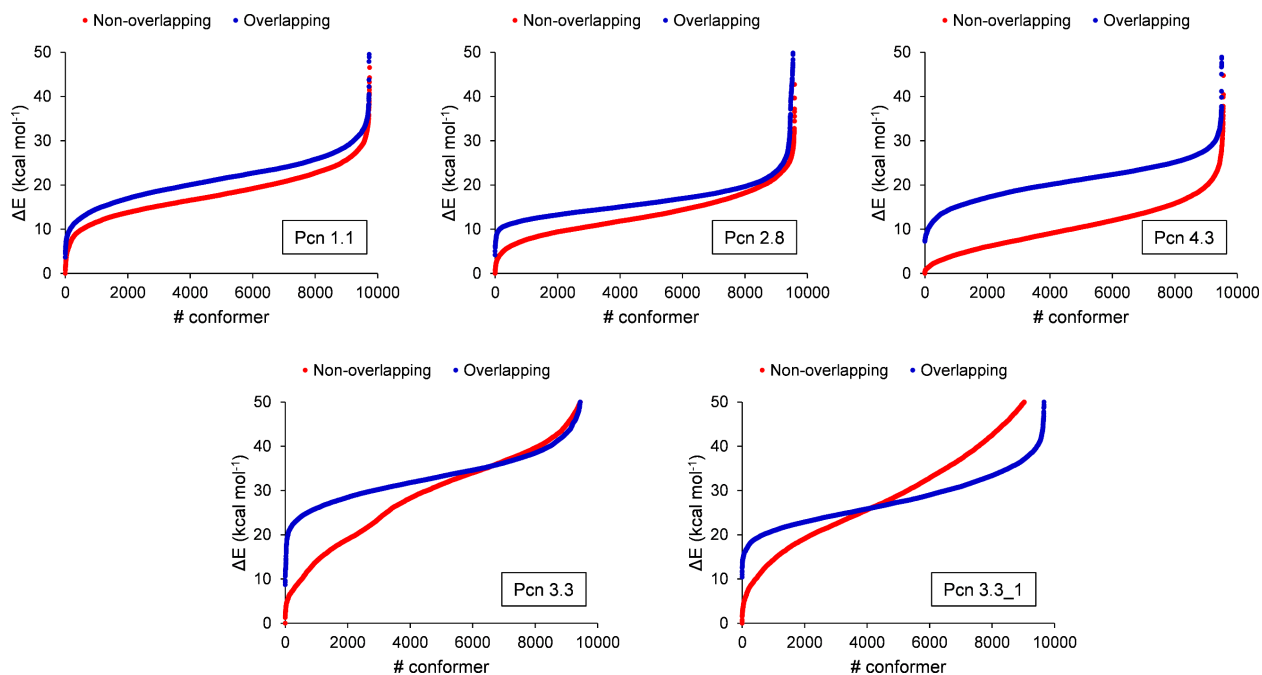



**Figure S22.** Backbone dihedral angles ( $\phi/\psi$ ) distribution derived from 1  $\mu$ s MD simulations for amino acids Abu11 to L-Ala21 in Pcn 3.3 WT with overlapping ring pattern.

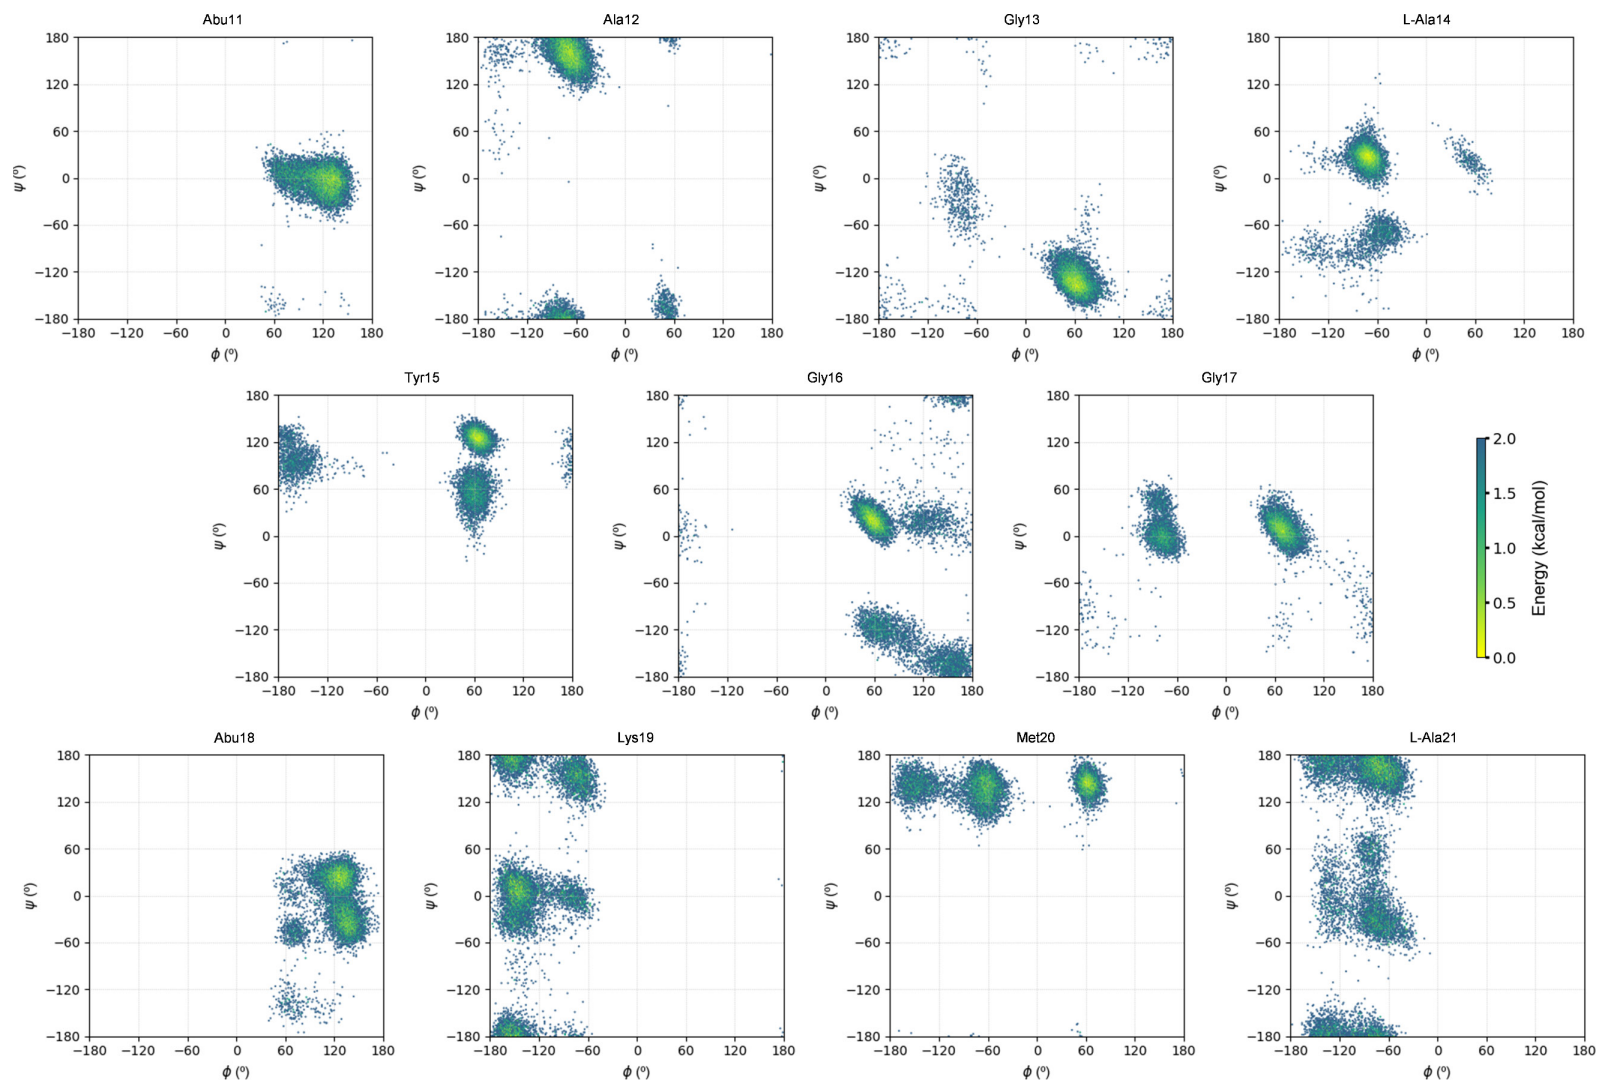

**Figure S23.** Backbone dihedral angles ( $\phi/\psi$ ) distribution derived from 1  $\mu$ s MD simulations for amino acids Abu11 to L-Ala21 in Pcn 3.3 WT with non-overlapping ring pattern.

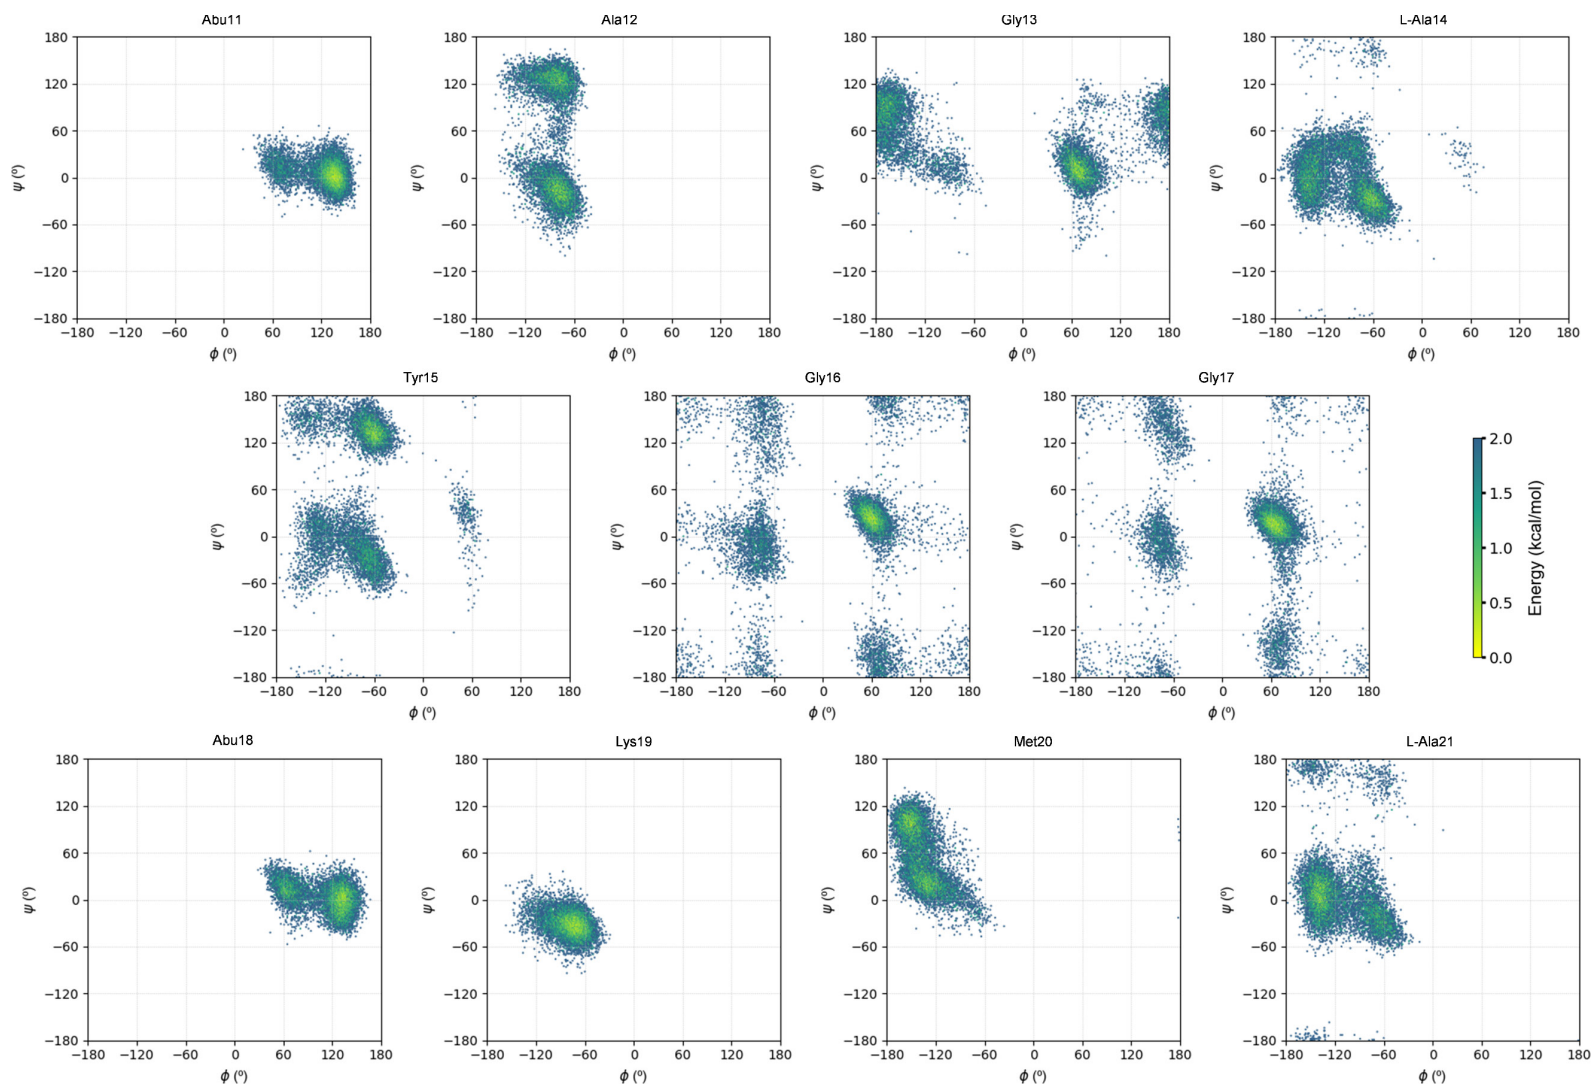

**Figure S24.** Backbone dihedral angles ( $\phi/\psi$ ) distribution derived from 1  $\mu$ s MD simulations for amino acids Abu11 to L-Ala21 in Pcn 3.3\_1 with overlapping ring pattern.

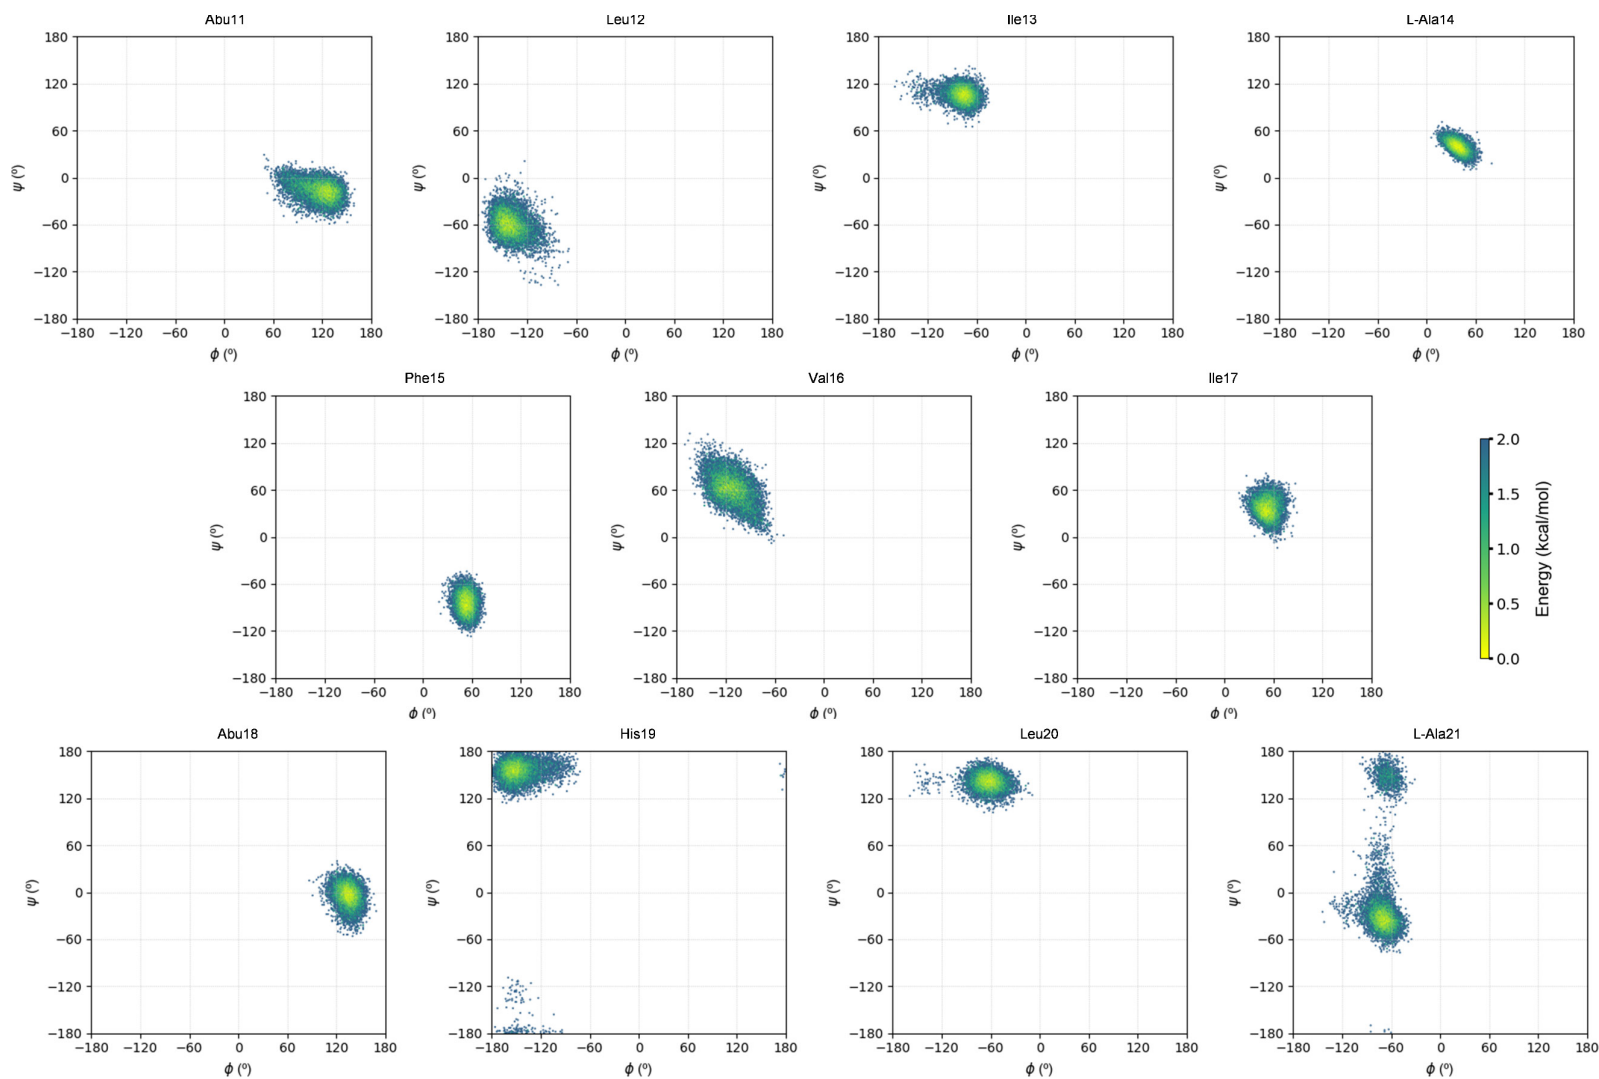

**Figure S25.** Backbone dihedral angles ( $\phi/\psi$ ) distribution derived from 1  $\mu$ s MD simulations for amino acids Abu11 to L-Ala21 in Pcn 3.3\_1 with non-overlapping ring pattern.

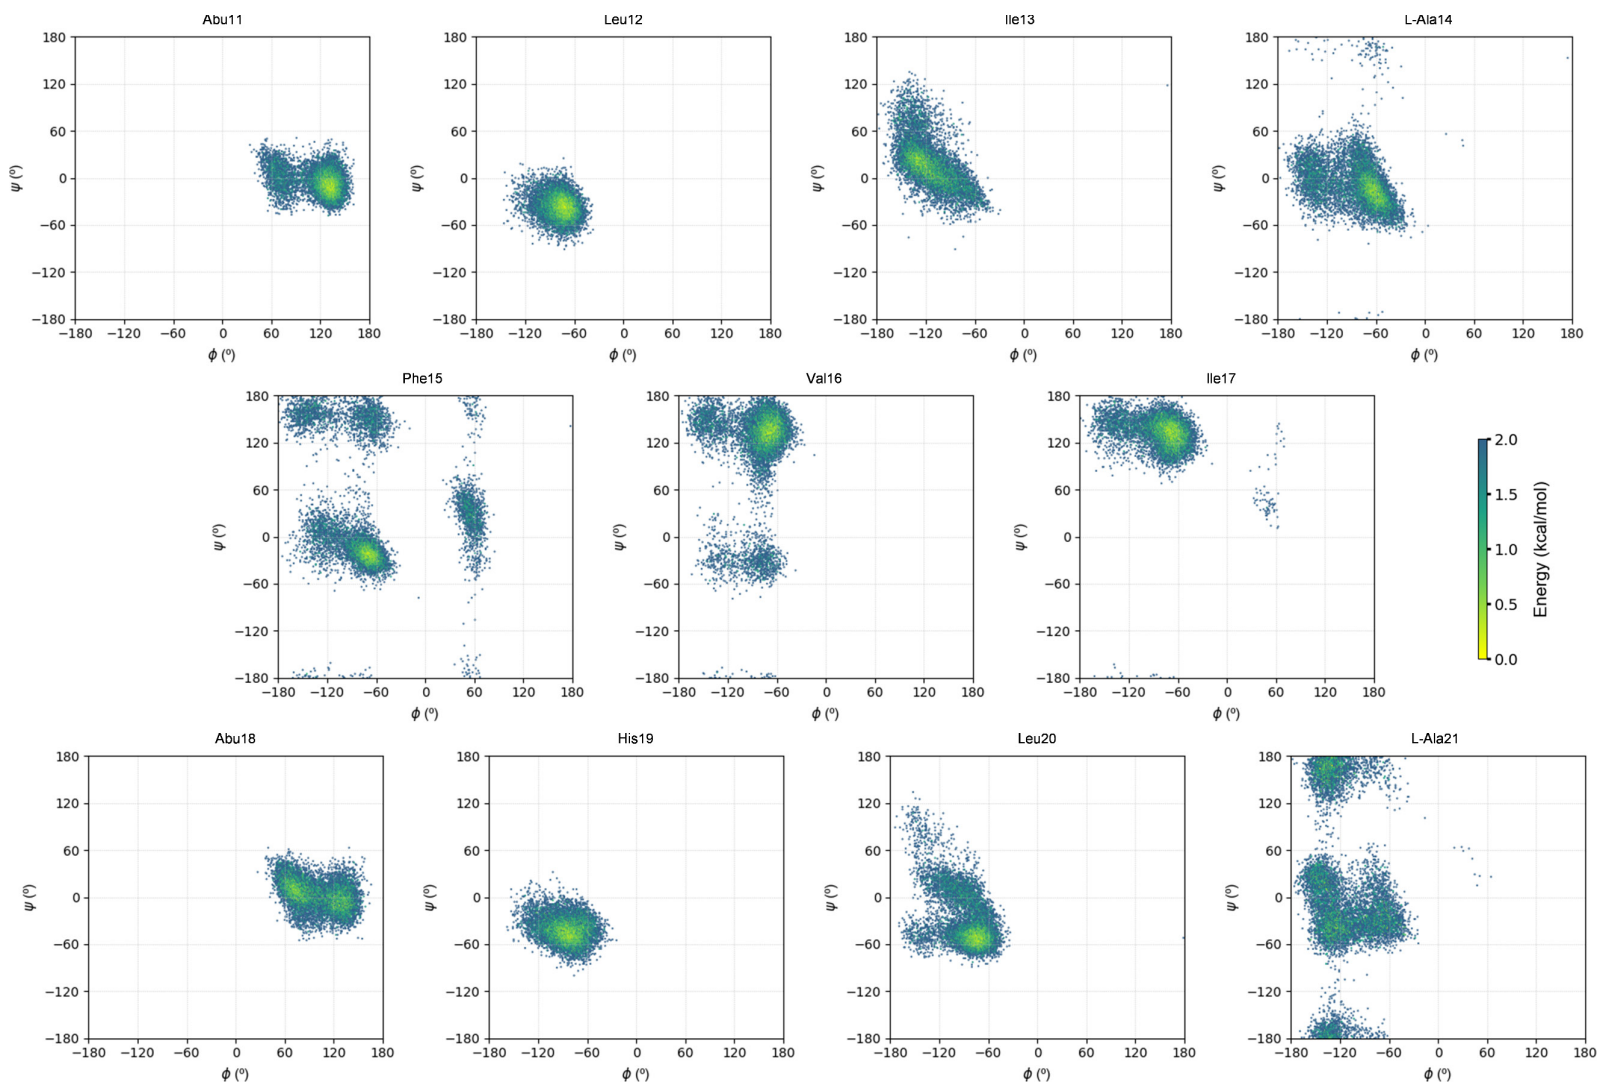

Figure S26. TIMS-MS/MS analysis of ProcA WT-Y15F/G16V/G17I.

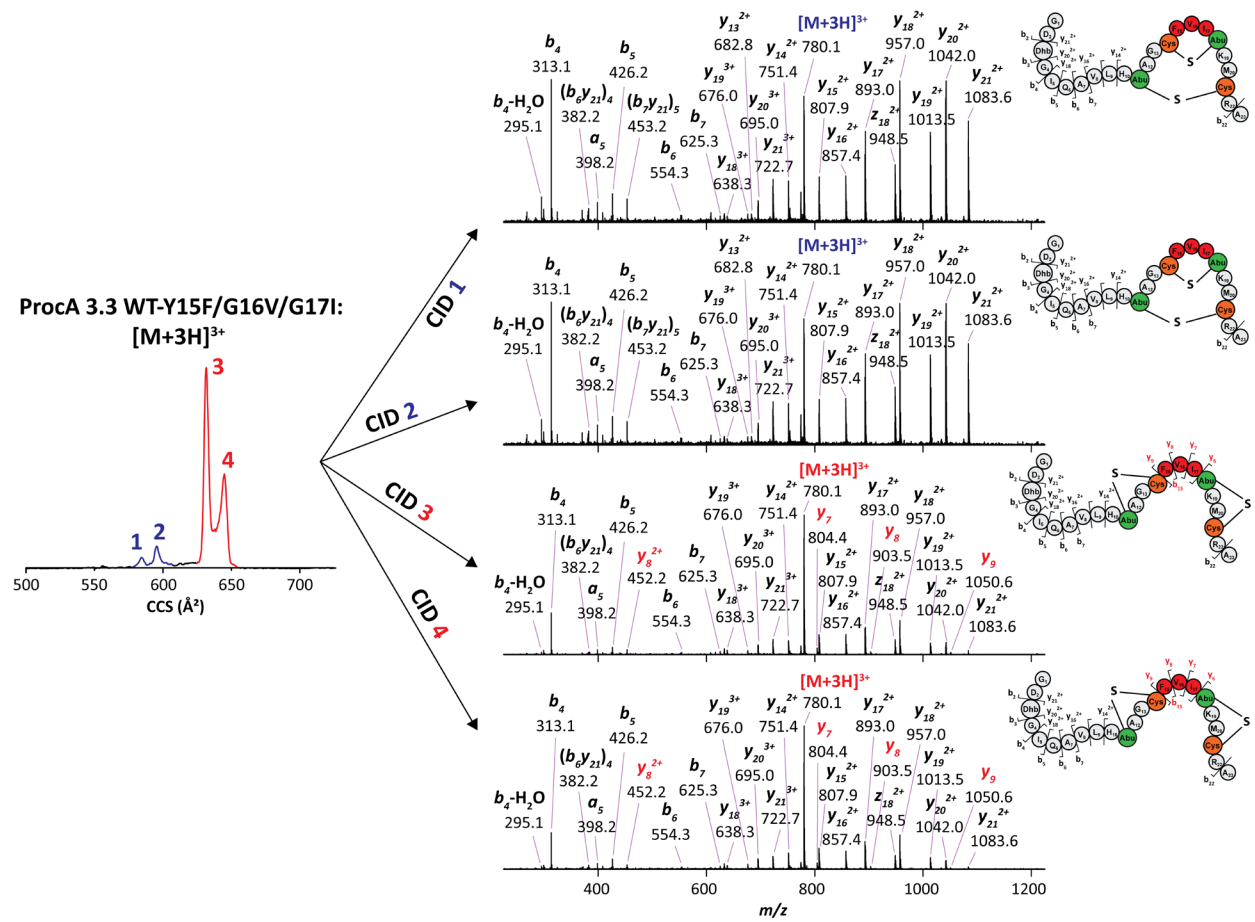

Figure S27. TIMS-MS/MS analysis of ProcA3.3\_10-L15Y/L16G/V17G).

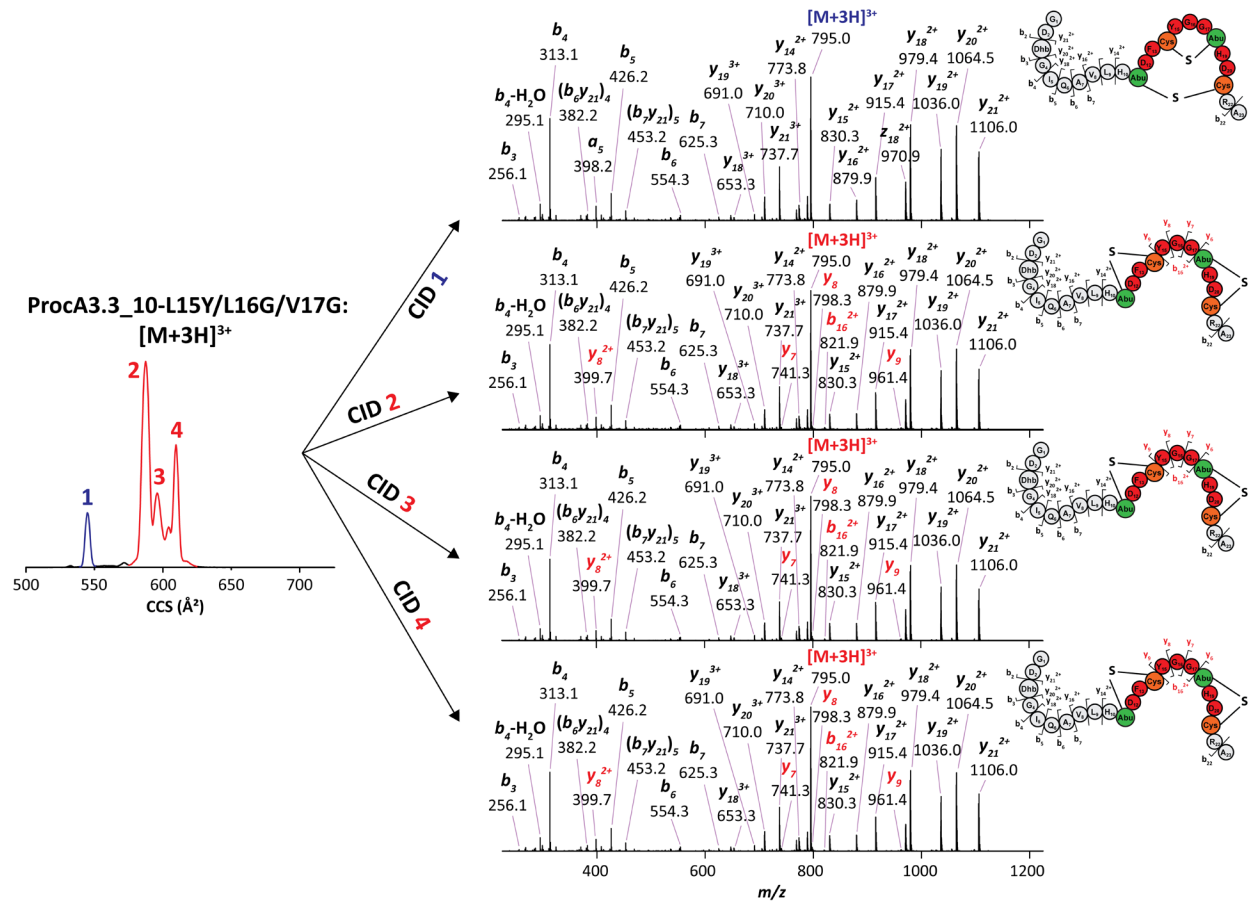

**Figure S28.** LC-ESI-MS/MS analysis of ProcA3.3 WT-Y15L/G16L/G17V modified by ProcM. (A) (top) extracted ion chromatogram for the selected parent ion  $[M+3H]^{3+}$ ; product with overlapping rings is shown in blue and product with non-overlapping rings is shown in red; (middle) MS/MS spectrum with b- (blue) and y- (red) ion fragments; (bottom) list of matched fragment ions showing theoretical masses, charge states, and mass error (ppm). (B) TIMS-MS/MS spectra of ProcA3.3 WT-Y15L/G16L/G17V.

**A**

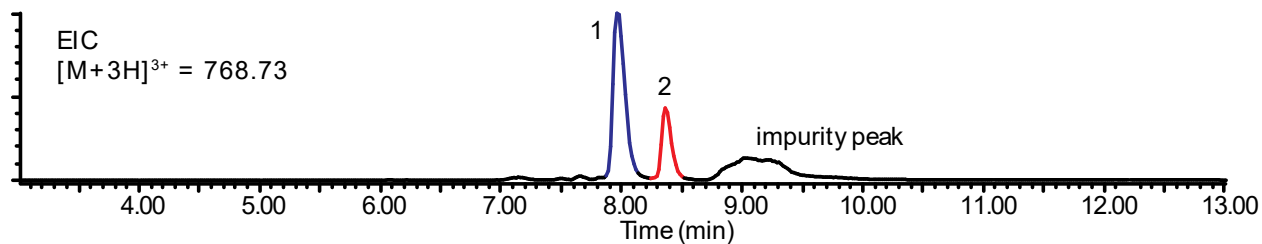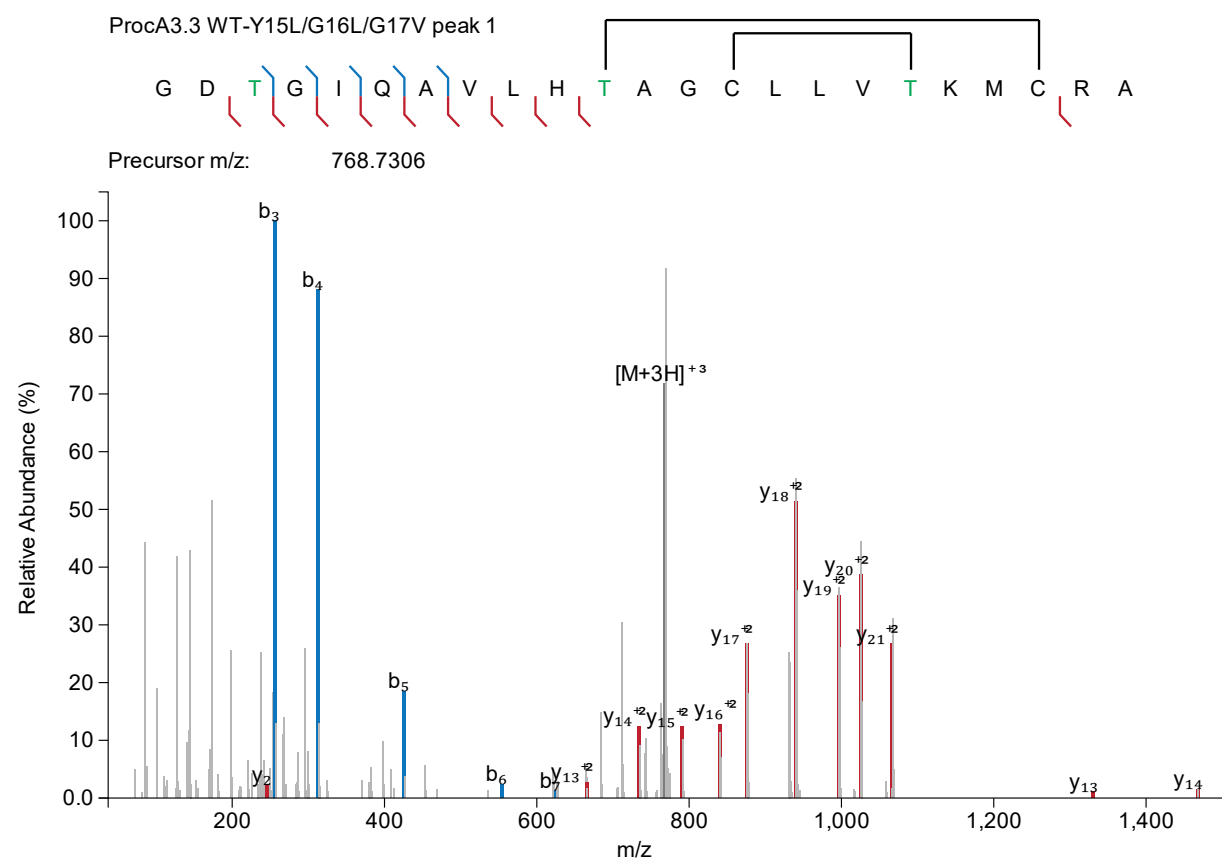

| ion | charge | Observed mass | Theoretical mass | Error (ppm) |
|-----|--------|---------------|------------------|-------------|
| y2  | 1      | 246.1576      | 246.1561         | 6.1158      |
| b3  | 1      | 256.0857      | 256.0928         | -27.6626    |
| b4  | 1      | 313.1108      | 313.1143         | -11.1872    |

|      |   |          |          |          |
|------|---|----------|----------|----------|
| b5   | 1 | 426.2012 | 426.1983 | 6.8309   |
| b6   | 1 | 554.2709 | 554.2569 | 25.3415  |
| b7   | 1 | 625.2985 | 625.294  | 7.1602   |
| y13  | 2 | 665.8409 | 665.8433 | -3.4909  |
| y14  | 2 | 734.3664 | 734.3727 | -8.5902  |
| M+3H | 3 | 768.7146 | 768.7306 | -20.9135 |
| y15  | 2 | 790.9175 | 790.9147 | 3.5149   |
| y16  | 2 | 840.4463 | 840.4489 | -3.1213  |
| y16  | 2 | 840.4689 | 840.4489 | 23.7424  |
| y17  | 2 | 875.974  | 875.9675 | 7.4025   |
| y18  | 2 | 939.9915 | 939.9968 | -5.6761  |
| y19  | 2 | 996.538  | 996.5388 | -0.8064  |
| y20  | 2 | 1025.034 | 1025.05  | -14.8306 |
| y21  | 2 | 1066.569 | 1066.568 | 0.4718   |
| y13  | 1 | 1330.658 | 1330.679 | -16.0661 |
| y13  | 1 | 1330.7   | 1330.679 | 15.7748  |
| y14  | 1 | 1467.709 | 1467.738 | -19.6832 |
| y14  | 1 | 1467.74  | 1467.738 | 1.018    |
| y14  | 1 | 1467.77  | 1467.738 | 21.7343  |

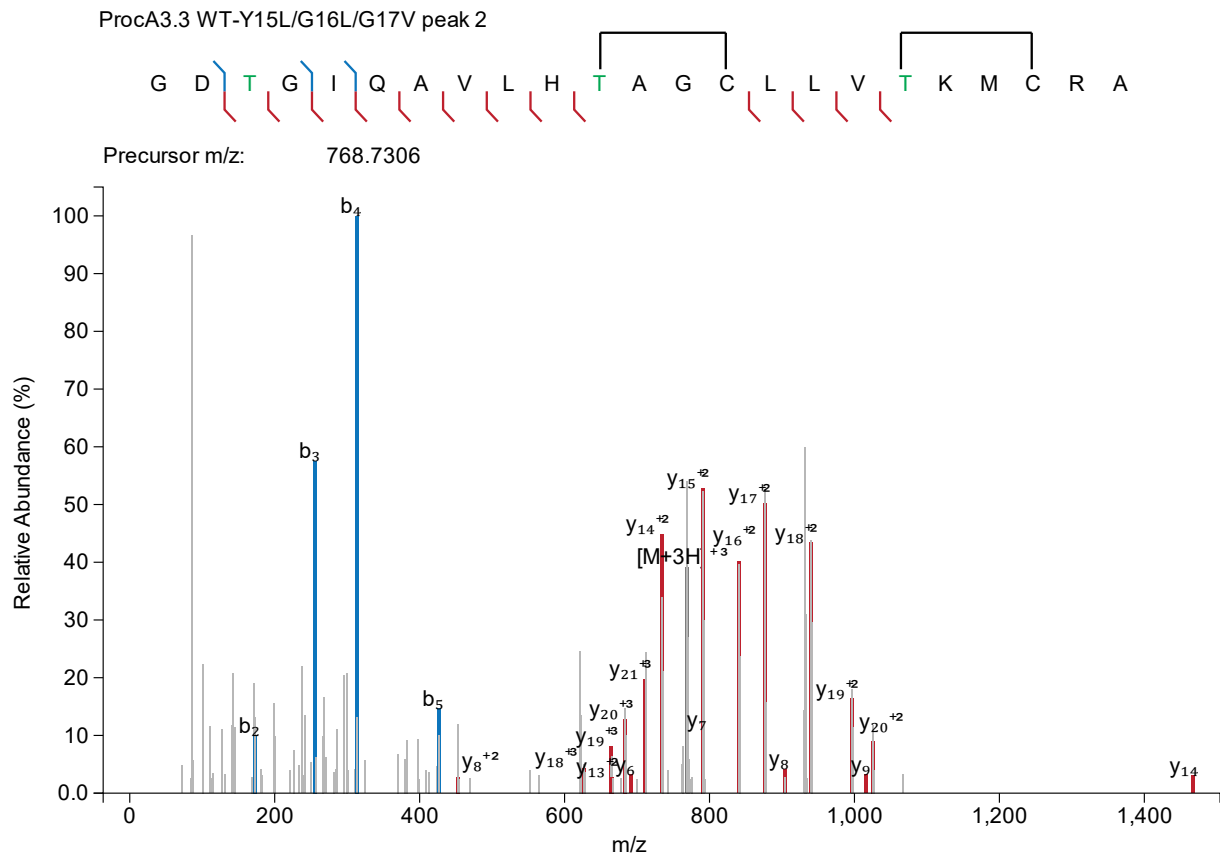



| ion  | charge | Observed mass | Theoretical mass | Error (ppm) |
|------|--------|---------------|------------------|-------------|
| b2   | 1      | 173.0523      | 173.0557         | -19.7466    |
| b3   | 1      | 256.0982      | 256.0928         | 20.9823     |
| b4   | 1      | 313.1183      | 313.1143         | 13.0624     |
| b5   | 1      | 426.1988      | 426.1983         | 1.1422      |
| y8   | 2      | 452.2553      | 452.2488         | 14.4479     |
| y18  | 3      | 626.9902      | 627.0003         | -16.0627    |
| y18  | 3      | 627.0095      | 627.0003         | 14.772      |
| y19  | 3      | 664.686       | 664.695          | -13.551     |
| y13  | 2      | 665.8336      | 665.8433         | -14.4625    |
| y20  | 3      | 683.7047      | 683.7021         | 3.7126      |
| y6   | 1      | 691.332       | 691.3378         | -8.3435     |
| y21  | 3      | 711.3866      | 711.3812         | 7.6038      |
| y14  | 2      | 734.3725      | 734.3727         | -0.2656     |
| M+3H | 3      | 768.7337      | 768.7306         | 3.9663      |
| y7   | 1      | 790.4054      | 790.4062         | -1.0587     |
| y15  | 2      | 790.9188      | 790.9147         | 5.0805      |
| y16  | 2      | 840.4396      | 840.4489         | -11.1011    |
| y17  | 2      | 875.9493      | 875.9675         | -20.7451    |
| y17  | 2      | 875.9807      | 875.9675         | 15.0157     |
| y8   | 1      | 903.5021      | 903.4903         | 13.1206     |
| y18  | 2      | 939.9939      | 939.9968         | -3.0443     |
| y19  | 2      | 996.5222      | 996.5388         | -16.7263    |
| y9   | 1      | 1016.575      | 1016.574         | 0.9911      |
| y20  | 2      | 1025.038      | 1025.05          | -11.0991    |
| y20  | 2      | 1025.076      | 1025.05          | 25.7362     |
| y14  | 1      | 1467.715      | 1467.738         | -15.705     |
| y14  | 1      | 1467.761      | 1467.738         | 15.2345     |



**Figure S29.** Comparison of the data of the extracted TIMS spectra from the mixture of peptide with data from individual purified peptides (insets). As reported previously, ProcM-C971H in which one of the Cys ligands to the  $Zn^{2+}$  in the active site of the cyclization domain is mutated to His also produces a mixture of products, which was used as a control.<sup>21</sup>

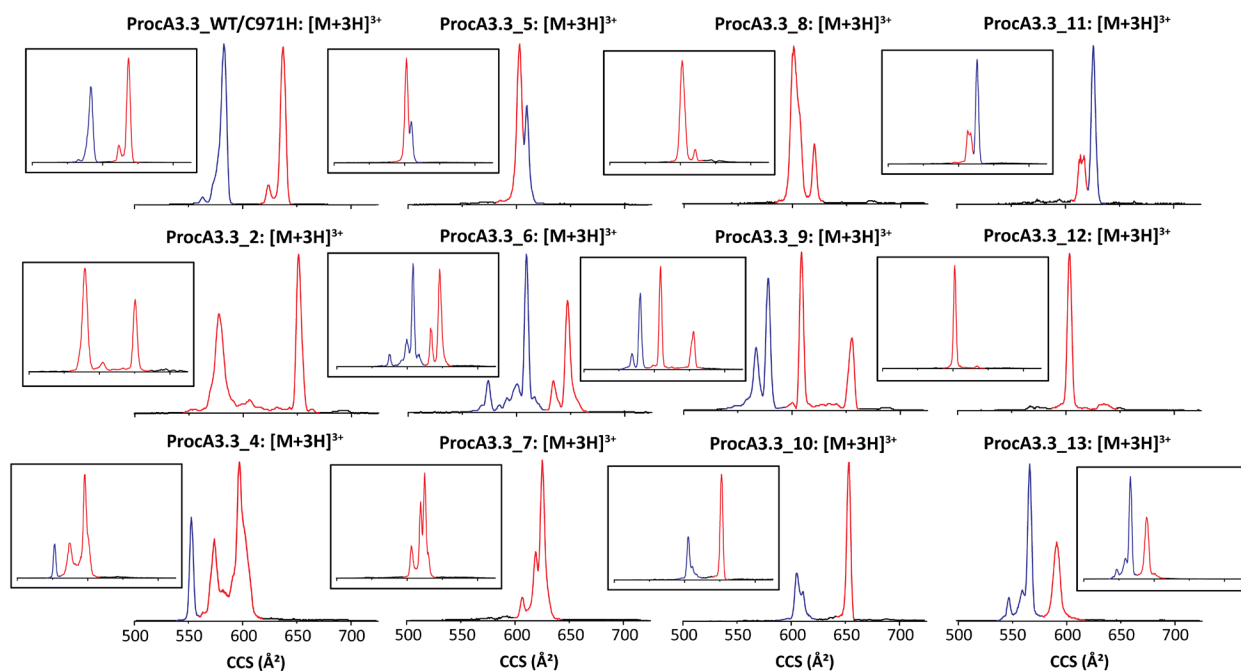

**Figure S30.** LC-ESI-MS/MS analysis of ProcA3.3\_13 modified by ProcM. (top) extracted ion chromatogram for the selected parent ion  $[M+3H]^{3+}$ ; product with overlapping rings is shown in blue and product with non-overlapping rings is shown in red; (middle) MS/MS spectrum with b- (blue) and y- (red) ion fragments (bottom) list of matched fragment ions showing theoretical masses, charge states, and mass error (ppm).

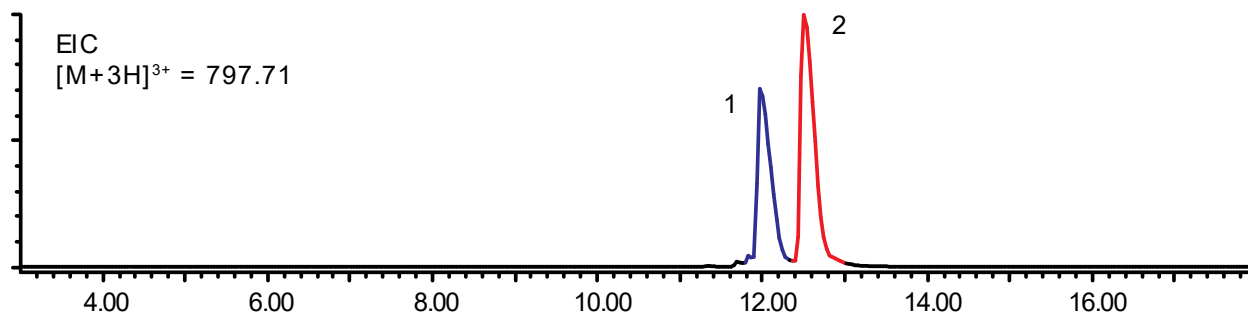

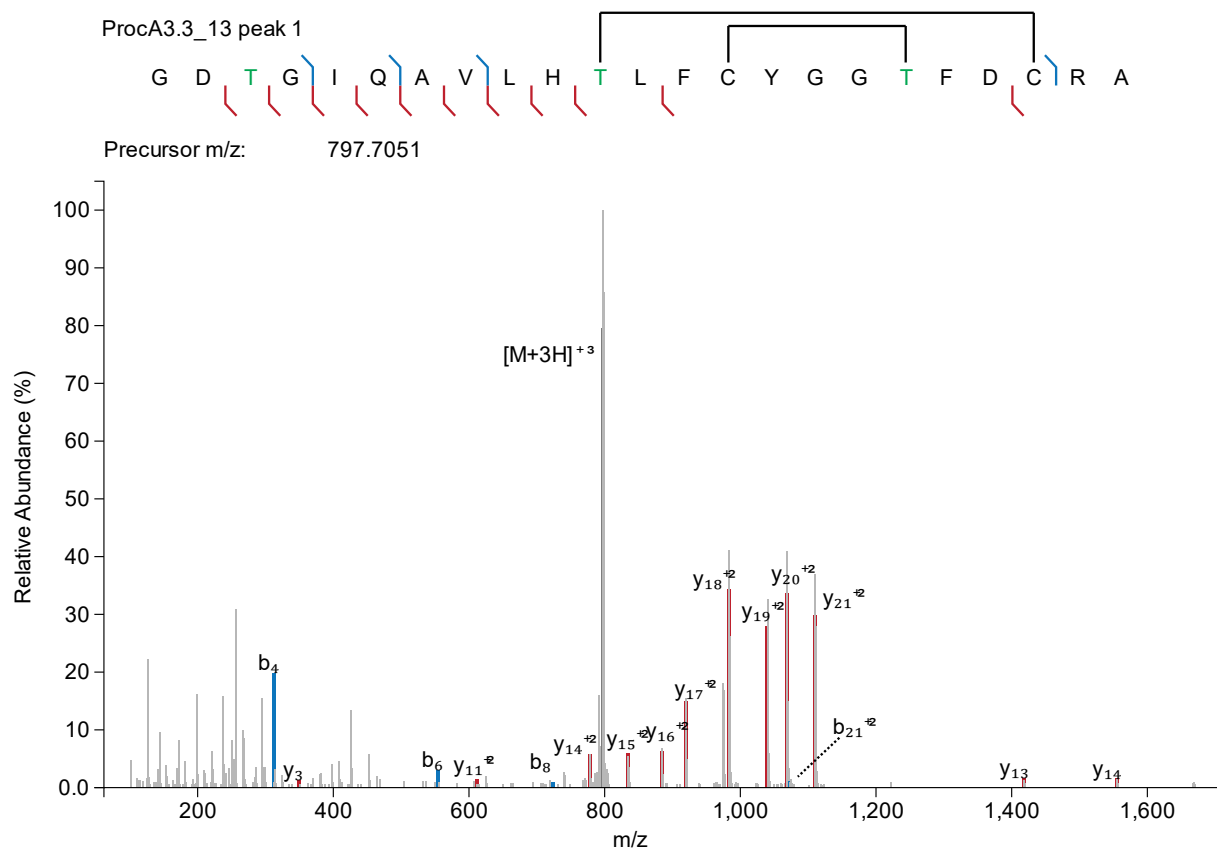

| ion  | charge | Observed mass | Theoretical mass | Error (ppm) |
|------|--------|---------------|------------------|-------------|
| b4   | 1      | 313.1151      | 313.1143         | 2.7185      |
| y3   | 1      | 349.1679      | 349.1653         | 7.567       |
| b6   | 1      | 554.2659      | 554.2569         | 16.2727     |
| y11  | 2      | 611.2496      | 611.2444         | 8.402       |
| b8   | 1      | 724.3691      | 724.3624         | 9.2168      |
| y14  | 2      | 777.8412      | 777.8345         | 8.6728      |
| M+3H | 3      | 797.6984      | 797.7051         | -8.4459     |
| y15  | 2      | 834.3706      | 834.3765         | -7.077      |
| y16  | 2      | 883.9076      | 883.9107         | -3.5152     |
| y17  | 2      | 919.4296      | 919.4293         | 0.3439      |
| y18  | 2      | 983.466       | 983.4586         | 7.5379      |
| y19  | 2      | 1040.0104     | 1040.0006        | 9.4235      |
| y20  | 2      | 1068.5098     | 1068.5113        | -1.4328     |
| b21  | 2      | 1073.4741     | 1073.4797        | -5.246      |
| y21  | 2      | 1110.0403     | 1110.0299        | 9.381       |
| y13  | 1      | 1417.6289     | 1417.6028        | 18.4388     |
| y14  | 1      | 1554.6753     | 1554.6617        | 8.7838      |

ProcA3.3\_13 peak 2

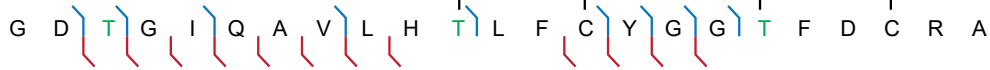

Precursor m/z: 797.7051

Charge: +3

Fragmented Bonds: 14/22

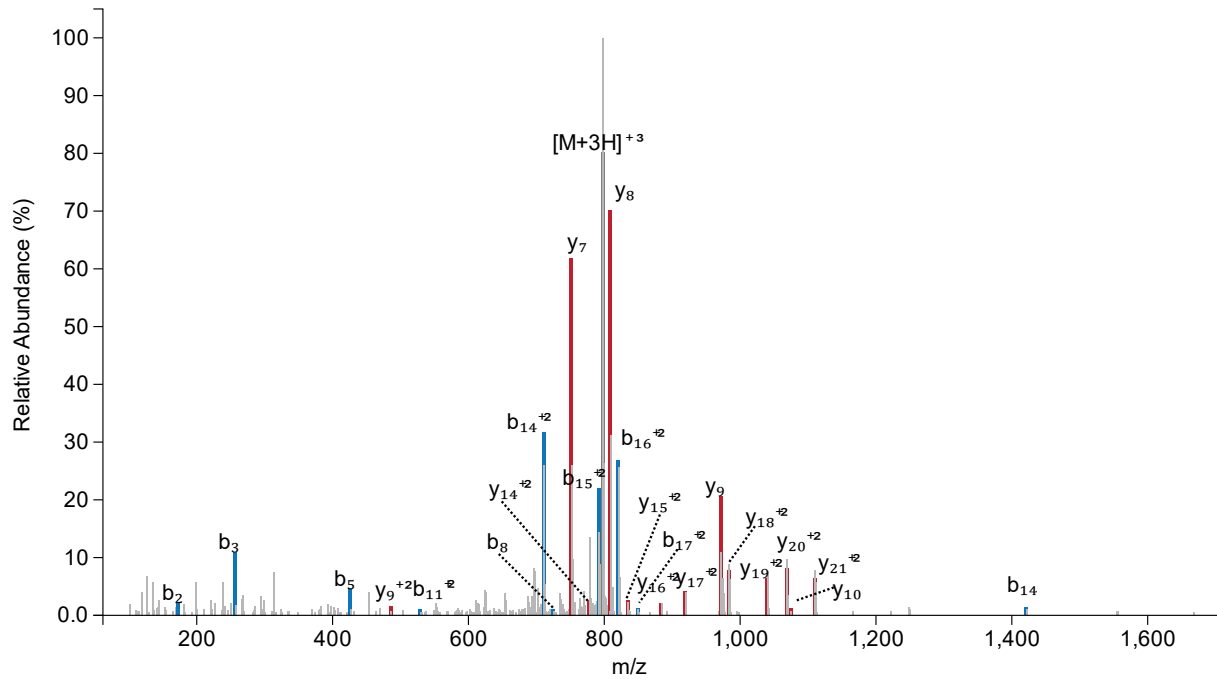

| ion  | charge | Observed mass | Theoretical mass | Error (ppm) |
|------|--------|---------------|------------------|-------------|
| b2   | 1      | 173.0541      | 173.0557         | -9.3989     |
| b3   | 1      | 256.0909      | 256.0928         | -7.541      |
| b5   | 1      | 426.1984      | 426.1983         | 0.1162      |
| y9   | 2      | 486.2092      | 486.2056         | 7.3939      |
| b11  | 2      | 529.2837      | 529.2749         | 16.6009     |
| b14  | 2      | 710.8579      | 710.8557         | 3.1201      |
| b8   | 1      | 724.3734      | 724.3624         | 15.1564     |
| y7   | 1      | 751.3286      | 751.3192         | 12.5643     |
| y14  | 2      | 777.8298      | 777.8345         | -5.9682     |
| b15  | 2      | 792.3746      | 792.3874         | -16.1666    |
| M+3H | 3      | 797.702       | 797.7051         | -3.9426     |
| y8   | 1      | 808.3418      | 808.3406         | 1.4644      |
| b16  | 2      | 820.9038      | 820.8981         | 6.8811      |
| y15  | 2      | 834.3739      | 834.3765         | -3.106      |
| b17  | 2      | 849.4179      | 849.4089         | 10.7058     |
| y16  | 2      | 883.9103      | 883.9107         | -0.4362     |
| y17  | 2      | 919.4319      | 919.4293         | 2.8415      |
| y9   | 1      | 971.4049      | 971.404          | 0.9673      |
| y18  | 2      | 983.4523      | 983.4586         | -6.3379     |
| y19  | 2      | 1039.9962     | 1040.0006        | -4.2139     |
| y20  | 2      | 1068.5102     | 1068.5113        | -1.0717     |
| y10  | 1      | 1074.4128     | 1074.4132        | -0.3775     |

|     |   |           |           |         |
|-----|---|-----------|-----------|---------|
| y21 | 2 | 1110.025  | 1110.0299 | -4.3895 |
| b14 | 1 | 1420.7114 | 1420.7042 | 5.1138  |

**Table S3.** Ring sizes of lanthionines/methylanthionines in currently structurally characterized class II lanthipeptides. Only structurally unique compounds were analyzed;<sup>22</sup> structural homologs of the compounds in the table that are variants with the same ring patterns were not counted. The Lan or MeLan bisamino acids were counted as 2 amino acids (aa).

| Compound                              | 4-aa        | 5-aa        | 6-aa        | Other (size) |
|---------------------------------------|-------------|-------------|-------------|--------------|
| Actagardine <sup>23</sup>             |             |             | 3           | 1 (9)        |
| BhtA1 <sup>24</sup>                   |             |             | 1           | 2 (8,11)     |
| BhtA2 <sup>24</sup>                   | 2           | 1           |             |              |
| Bicereucin B                          |             |             | 1           |              |
| Birimositide B <sup>22</sup>          | 2           | 2           |             |              |
| Bovicin HJ50 <sup>25</sup>            |             |             | 1           | 1 (23)       |
| Carnolysin A1 <sup>26</sup>           |             | 3           |             |              |
| Cerecidin A1-A7 <sup>27</sup>         |             | 2           |             |              |
| Cinnamycin B <sup>28</sup>            |             |             |             | 3 (7,11,18)  |
| CylL <sub>L</sub> <sup>29</sup>       |             | 3           |             |              |
| CylL <sub>S</sub> <sup>29</sup>       |             | 2           |             |              |
| Flavecin A1 <sup>26</sup>             | 1           |             | 1           | 2 (8,11)     |
| Geobacillin II <sup>26</sup>          |             | 3           | 1           |              |
| Haloduracin $\alpha$ <sup>24</sup>    |             |             | 1           | 2 (8,11)     |
| Haloduracin $\beta$ <sup>24</sup>     | 2           | 2           |             |              |
| Lacticin 481 <sup>28</sup>            |             |             | 1           | 2 (9,15)     |
| Lacticin 3147 $\alpha$ <sup>25</sup>  |             |             | 1           | 3 (2,8,11)   |
| Lacticin 3147 $\beta$ <sup>25</sup>   | 2           | 1           |             |              |
| Lichenidicidin $\alpha$ <sup>30</sup> |             | 1           | 1           | 2 (8,11)     |
| Lichenidicidin $\beta$ <sup>30</sup>  | 2           | 2           |             |              |
| Mersacidin <sup>28</sup>              |             |             | 1           | 2 (2, 9)     |
| Michiganin A <sup>28</sup>            |             |             | 2           | 1 (9)        |
| Nukacin ISK-1 <sup>25</sup>           |             |             | 1           | 2 (9,15)     |
| Plantaricin C <sup>31</sup>           | 2           |             | 1           | 1 (21)       |
| Prochlorosin 1.1 <sup>25</sup>        |             | 2           |             |              |
| Prochlorosin 1.7 <sup>25</sup>        | 1           | 1           |             | 1 (10)       |
| Prochlorosin 2.1 <sup>32</sup>        | 1           |             | 1           | 2 (9,9)      |
| Prochlorosin 2.8 <sup>25</sup>        |             |             |             | 2 (7,7)      |
| Prochlorosin 2.11 <sup>25</sup>       |             | 1           |             | 2 (7,7)      |
| Prochlorosin 3.3 <sup>25</sup>        |             | 1           |             | 1 (11)       |
| Prochlorosin 4.3 <sup>25</sup>        | 1           | 1           |             |              |
| Salivaricin A <sup>33</sup>           |             |             | 2           | 1 (11)       |
| Salivaricin B <sup>34</sup>           |             |             | 1           | 2 (9,15)     |
| Salivaricin E <sup>34</sup>           |             |             | 2           | 1 (11)       |
| <b>Total</b>                          | 16<br>(16%) | 28<br>(27%) | 23<br>(22%) | 36*<br>(35%) |

\* 7-aa rings: 5 (5%); 8-aa rings: 5 (5%); 9-aa rings: 8 (8%); 11-aa rings 9 (9%).

## References Supporting Information

- (1) Li, B.; Sher, D.; Kelly, L.; Shi, Y.; Huang, K.; Knerr, P. J.; Joewono, I.; Rusch, D.; Chisholm, S. W.; van der Donk, W. A. Catalytic promiscuity in the biosynthesis of cyclic peptide secondary metabolites in planktonic marine cyanobacteria *Proc. Natl. Acad. Sci. U.S.A.* **2010**, *107*, 10430.
- (2) Shi, Y.; Yang, X.; Garg, N.; van der Donk, W. A. Production of lantipeptides in *Escherichia coli* *J. Am. Chem. Soc.* **2011**, *133*, 2338.
- (3) Brademan, D. R.; Riley, N. M.; Kwiecien, N. W.; Coon, J. J. Interactive Peptide Spectral Annotator: A Versatile Web-based Tool for Proteomic Applications\* *Molecular & Cellular Proteomics* **2019**, *18*, S193.
- (4) Fernandez-Lima, F. A.; Kaplan, D. A.; Suetering, J.; Park, M. A. Gas-phase separation using a Trapped Ion Mobility Spectrometer *Int. J. Ion Mobil. Spectrom.* **2011**, *14*, 93.
- (5) Fernandez-Lima, F. A.; Kaplan, D. A.; Park, M. A. Note: Integration of trapped ion mobility spectrometry with mass spectrometry *Rev. Sci. Instrum.* **2011**, *82*, 126106.
- (6) Hernandez, D. R.; Debord, J. D.; Ridgeway, M. E.; Kaplan, D. A.; Park, M. A.; Fernandez-Lima, F. Ion dynamics in a trapped ion mobility spectrometer *Analyst* **2014**, *139*, 1913.
- (7) Ridgeway, M. E.; Lubeck, M.; Jordens, J.; Mann, M.; Park, M. A. Trapped ion mobility spectrometry: A short review *Int. J. Mass Spectrom.* **2018**, *425*, 22.
- (8) Silveira, J. A.; Michelmann, K.; Ridgeway, M. E.; Park, M. A. Fundamentals of Trapped Ion Mobility Spectrometry Part II: Fluid Dynamics *J. Am. Soc. Mass Spectrom.* **2016**, *27*, 585.
- (9) Michelmann, K.; Silveira, J. A.; Ridgeway, M. E.; Park, M. A. Fundamentals of trapped ion mobility spectrometry *J. Am. Soc. Mass Spectrom.* **2015**, *26*, 14.
- (10) Case, D. A.; Ben-Shalom, I. Y.; Brozell, S. R.; Cerutti, D. S.; III, T. E. C.; Cruzeiro, V. W. D.; Darden, T. A.; Duke, R. E.; Ghoreishi, D.; Gilson, M. K.; Gohlke, H.; Goetz, A. W.; Greene, D.; Harris, R.; Homeyer, N.; Huang, Y.; Izadi, S.; Kovalenko, A.; Kurtzman, T.; Lee, T. S.; LeGrand, S.; Li, P.; Lin, C.; Liu, J.; Luchko, T.; Luo, R.; Mermelstein, D. J.; Merz, K. M.; Miao, Y.; Monard, G.; Nguyen, C.; Nguyen, H.; Omelyan, I.; Onufriev, A.; Pan, F.; Qi, R.; Roe, D. R.; Roitberg, A.; Sagui, C.; Schott-Verdugo, S.; Shen, J.; Simmerling, C. L.; Smith, J.; SalomonFerrer, R.; Swails, J.; Walker, R. C.; Wang, J.; Wei, H.; Wolf, R. M.; Wu, X.; Xiao, L.; York, D. M.; Kollman, P. A. AMBER 2018. 2018, University of California, San Francisco
- (11) Maier, J. A.; Martinez, C.; Kasavajhala, K.; Wickstrom, L.; Hauser, K. E.; Simmerling, C. ff14SB: Improving the Accuracy of Protein Side Chain and Backbone Parameters from ff99SB *J. Chem. Theory Comput.* **2015**, *11*, 3696.
- (12) Wang, J.; Wolf, R. M.; Caldwell, J. W.; Kollman, P. A.; Case, D. A. Development and testing of a general amber force field *J. Comput. Chem.* **2004**, *25*, 1157.
- (13) Bayly, C. I.; Cieplak, P.; Cornell, W. D.; Kollman, P. A. A well-behaved electrostatic potential based method using charge restraints for deriving atomic charges: the RESP model *J. Phys. Chem.* **1993**, *97*, 10269.
- (14) Frisch, M. J.; Trucks, G. W.; Schlegel, H. B.; Scuseria, G. E.; Robb, M. A.; Cheeseman, J. R.; Scalmani, G.; Barone, V.; Petersson, G. A.; Nakatsuji, H.; Li, X.; Caricato, M.; Marenich, A. V.; Bloino, J.; Janesko, B. G.; Gomperts, R.; Mennucci, B.; Hratchian, H. P.; Ortiz, J. V.; Izmaylov, A. F.; Sonnenberg, J. L.; Williams-Young, D.; Ding, F.; Lipparini, F.; Egidi, G.; Goings, J.; Peng, B.; Petrone, A.; Henderson, T.; Ranasinghe, D.; Zakrzewski, V. G.; Gao, J.; Rega, N.; Zheng, G.; Liang, W.; Hada, M.; Ehara, M.; Toyota, K.; Fukuda, R.; Hasegawa, J.; Ishida, M.; Nakajima, T.; Honda, Y.; Kitao, O.; Nakai, H.; Vreven, T.; Throssell, K.; Jr., J. A. M.; Peralta, J. E.; Ogliaro, F.; Bearpark, M. J.; Heyd, J. J.; Brothers, E. N.; Kudin, K. N.; Staroverov, V. N.; Keith, T. A.; Kobayashi, R.; Normand, J.; Raghavachari, K.; Rendell, A. P.;

- Burant, J. C.; Iyengar, S. S.; Tomasi, J.; Cossi, M.; Millam, J. M.; Klene, M.; Adamo, C.; Cammi, R.; Ochterski, J. W.; Martin, R. L.; Morokuma, K.; Farkas, O.; Foresman, J. B.; Fox, D. J. Gaussian 16, Revision C.01. 2016, Gaussian, Inc, Wallingford CT
- (15) Jorgensen, W. L.; Chandrasekhar, J.; Madura, J. D.; Impey, R. W.; Klein, M. L. Comparison of Simple Potential Functions for Simulating Liquid Water *J. Chem. Phys.* **1983**, *79*, 926.
- (16) Andersen, H. C. Molecular dynamics simulations at constant pressure and/or temperature *J. Chem. Phys.* **1980**, *72*, 2384.
- (17) Andrea, T. A.; Swope, W. C.; Andersen, H. C. The role of long ranged forces in determining the structure and properties of liquid water *J. Chem. Phys.* **1983**, *79*, 4576.
- (18) Miyamoto, S.; Kollman, P. A. Settle: An analytical version of the SHAKE and RATTLE algorithm for rigid water models *J. Comput. Chem.* **1992**, *13*, 952.
- (19) Darden, T.; York, D.; Pedersen, L. Particle mesh Ewald: An  $N$ -log( $N$ ) method for Ewald sums in large systems *J. Chem. Phys.* **1993**, *98*, 10089.
- (20) Onufriev, A.; Bashford, D.; Case, D. A. Exploring protein native states and large-scale conformational changes with a modified generalized born model *Proteins* **2004**, *55*, 383.
- (21) Yu, Y.; Mukherjee, S.; van der Donk, W. A. Product formation by the promiscuous lanthipeptide synthetase ProcM is under kinetic control *J. Am. Chem. Soc.* **2015**, *137*, 5140.
- (22) Walker, M. C.; Eslami, S. M.; Hetrick, K. J.; Ackenhusen, S. E.; Mitchell, D. A.; van der Donk, W. A. Precursor peptide-targeted mining of more than one hundred thousand genomes expands the lanthipeptide natural product family *BMC Genomics* **2020**, *21*, 387.
- (23) Zimmermann, N.; Jung, G. The three-dimensional solution structure of the lantibiotic murein-biosynthesis-inhibitor actagardine determined by NMR *Eur. J. Biochem.* **1997**, *246*, 809.
- (24) Xin, B.; Zheng, J.; Liu, H.; Li, J.; Ruan, L.; Peng, D.; Sajid, M.; Sun, M. Thusin, a Novel Two-Component Lantibiotic with Potent Antimicrobial Activity against Several Gram-Positive Pathogens *Frontiers Microbiol.* **2016**, *7*, 1115.
- (25) Repka, L. M.; Chekan, J. R.; Nair, S. K.; van der Donk, W. A. Mechanistic Understanding of Lanthipeptide Biosynthetic Enzymes *Chem. Rev.* **2017**, *117*, 5457.
- (26) Agrawal, P.; Khater, S.; Gupta, M.; Sain, N.; Mohanty, D. RiPPMiner: a bioinformatics resource for deciphering chemical structures of RiPPs based on prediction of cleavage and cross-links *Nucleic Acids Res.* **2017**, *45*, W80.
- (27) Wang, J.; Zhang, L.; Teng, K.; Sun, S.; Sun, Z.; Zhong, J. Cerecidins, novel lantibiotics from *Bacillus cereus* with potent antimicrobial activity *Appl. Environ. Microbiol.* **2014**, *80*, 2633.
- (28) Zhang, Q.; Yu, Y.; Vélasquez, J. E.; van der Donk, W. A. Evolution of lanthipeptide synthetases *Proc. Natl. Acad. Sci. USA* **2012**, *109*, 18361.
- (29) Tang, W.; Jiménez-Osés, G.; Houk, K. N.; van der Donk, W. A. Substrate control in stereoselective lanthionine biosynthesis *Nat. Chem.* **2014**, *7*, 57.
- (30) de Miguel, A.; Tapia-Rojo, R.; Utesch, T.; Mroginski, M. A. Structure, dynamics and kinetics of two-component Lantibiotic Lichenicidin *PLOS ONE* **2017**, *12*, e0179962.
- (31) Wiedemann, I.; Böttiger, T.; Bonelli, R. R.; Schneider, T.; Sahl, H.-G.; Martínez, B. Lipid II-Based Antimicrobial Activity of the Lantibiotic Plantaricin C *Appl. Environ. Microbiol.* **2006**, *72*, 2809.
- (32) Tang, W.; van der Donk, W. A. Structural characterization of four prochlorosins: a novel class of lanthipeptides produced by planktonic marine cyanobacteria *Biochemistry* **2012**, *51*, 4271.
- (33) Geng, M.; Austin, F.; Shin, R.; Smith, L.; Elliot, M. A. Covalent Structure and Bioactivity of the Type AII Lantibiotic Salivaricin A2 *Appl. Environ. Microbiol.* **2018**, *84*, e02528.
- (34) Barbour, A.; Wescombe, P.; Smith, L. Evolution of lantibiotic salivaricins: New weapons to fight infectious diseases *Trends Microbiol.* **2020**, *28*, 578.
